# Supplementary material
Source: Research Square preprint supplement (doi:10.21203/rs.3.rs-10047645/v1)

**Western blot – original data**

1. **APTAK**

- β-actin

Cytoplasmatic:
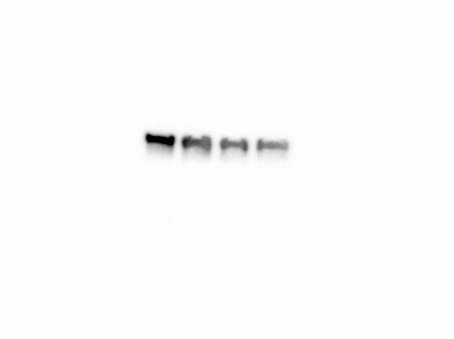
Nuclear:
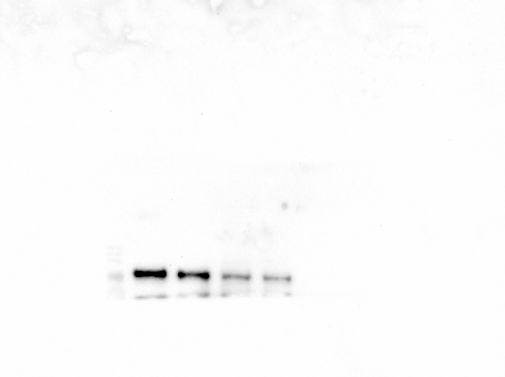


- Histone H3

Nuclear:
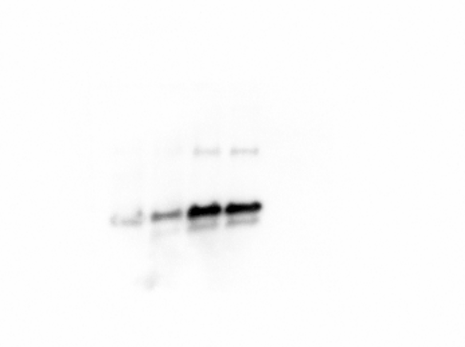


- STAT1 non-p

Cytoplasmatic and nuclear:
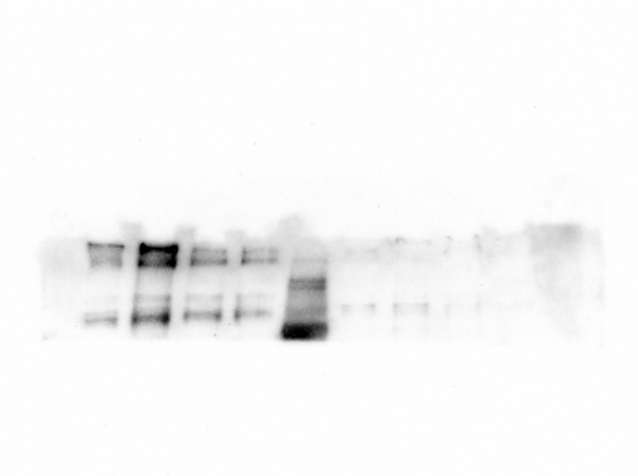


- p-STAT1

Cytoplasmatic and nuclear:
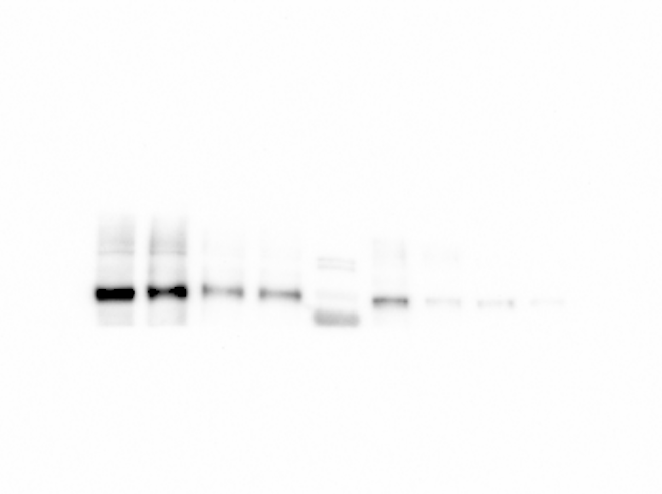


- STAT3 non-p

Cytoplasmatic and nuclear:
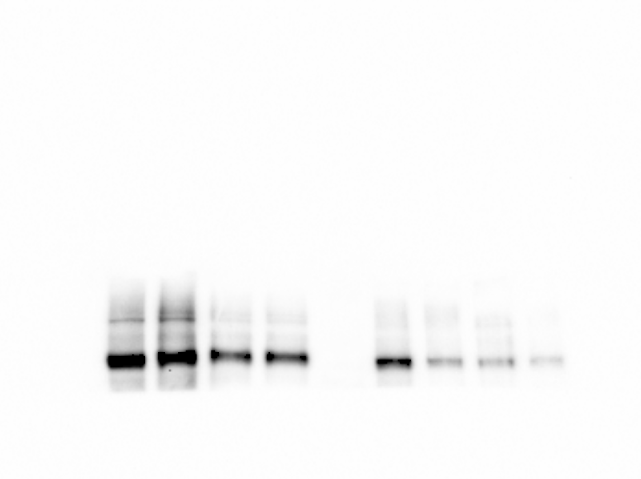


- p-STAT3

Cytoplasmatic and nuclear:
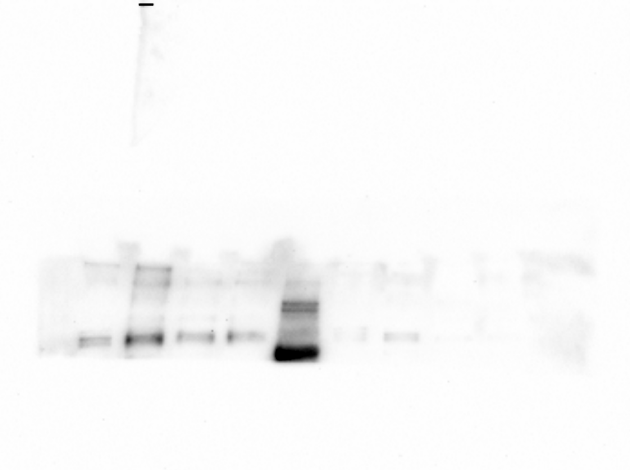


- β-catenin non-p

Cytoplasmatic and nuclear:
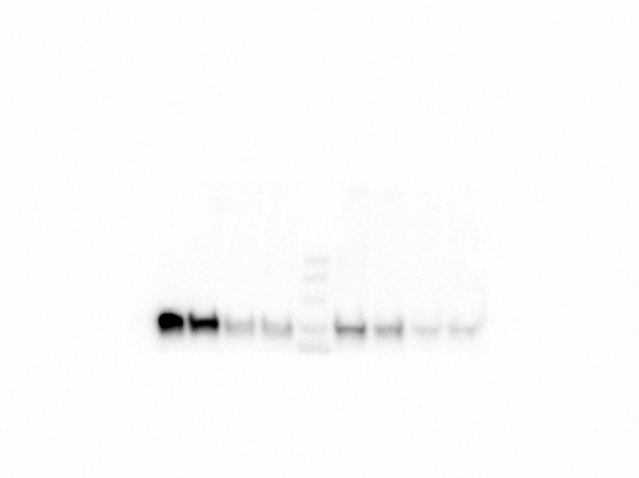


Nuclear:
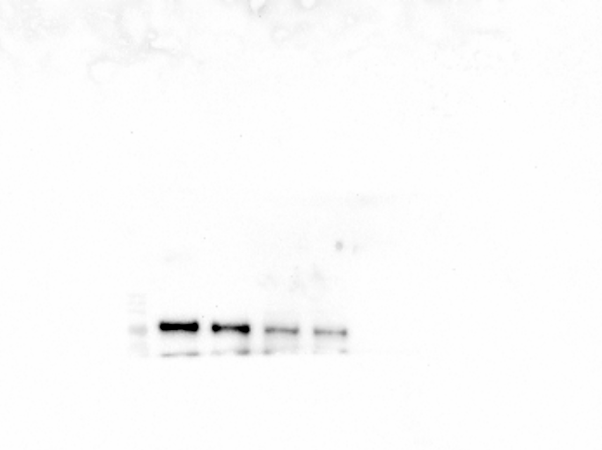


- p-β-catenin

Cytoplasmatic and nuclear:
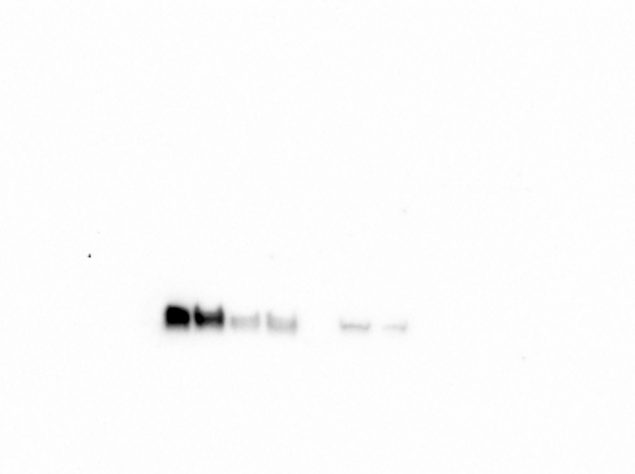


- GSK-3β non-p

Cytoplasmatic and nuclear:
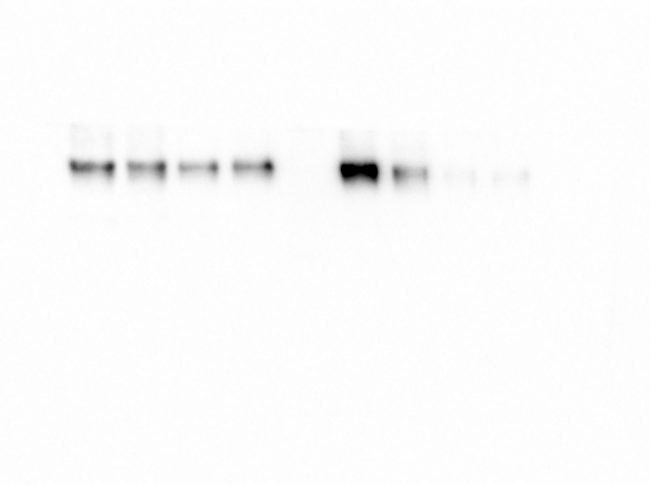


- p-GSK-3β

Cytoplasmatic and nuclear:
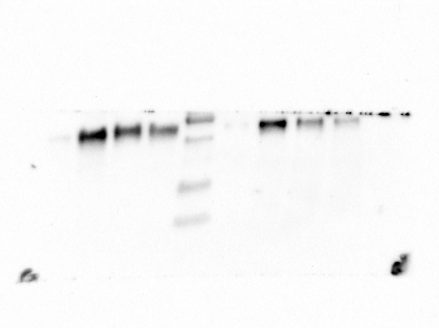

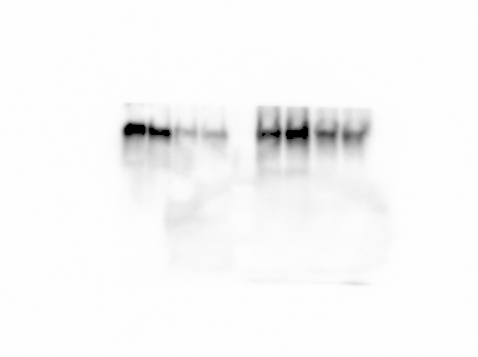


- p38 MAPK non-p

Cytoplasmatic and nuclear:
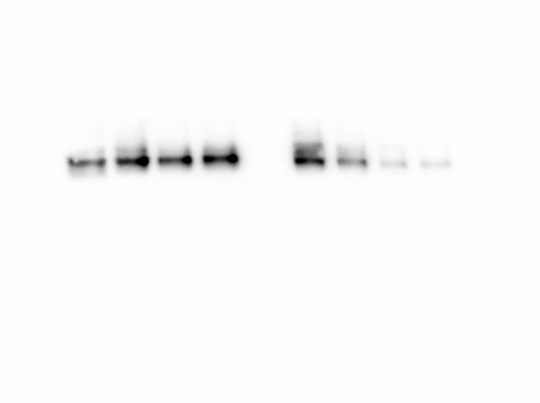


- p-p28 MAPK

Cytoplasmatic and nuclear:
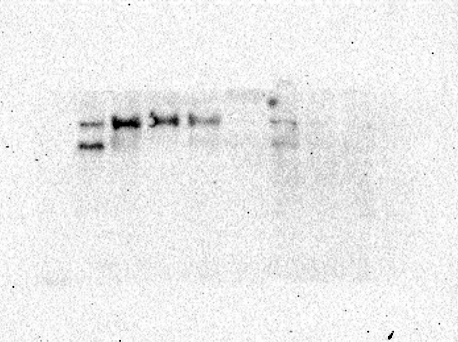


- NF-κB non-p

Cytoplasmatic and nuclear:
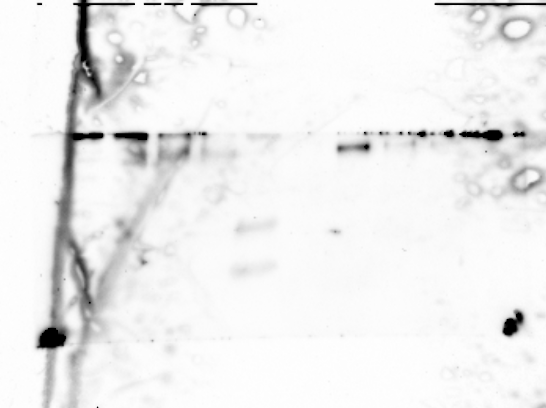


- p-NF-κB

Cytoplasmatic and nuclear:
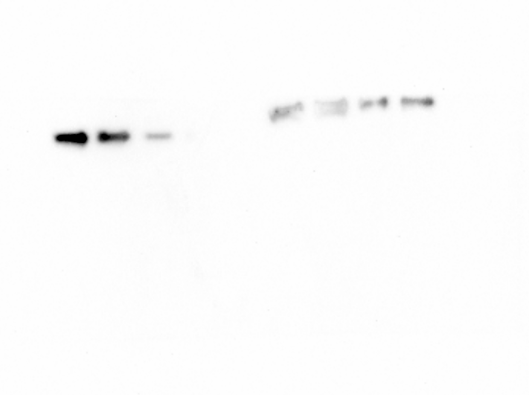


1. **Primary tumor**

- β-actin

Cytoplasmatic and nuclear:
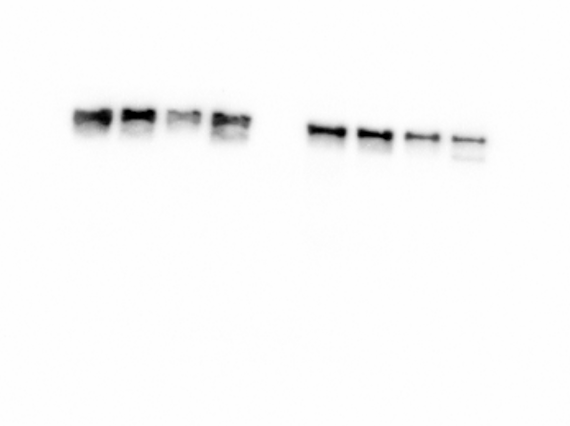


- Histone H3

Cytoplasmatic and nuclear:
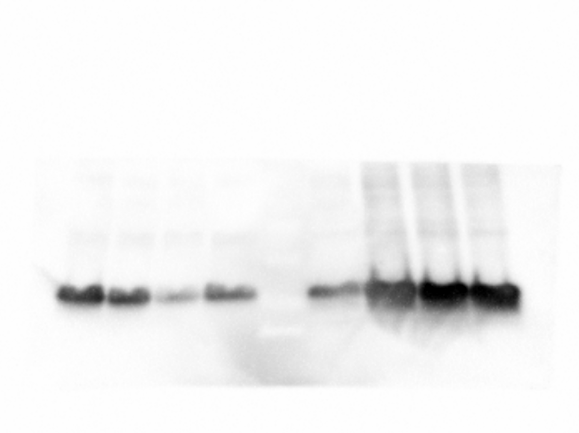


- p-β-catenin

Cytoplasmatic and nuclear:
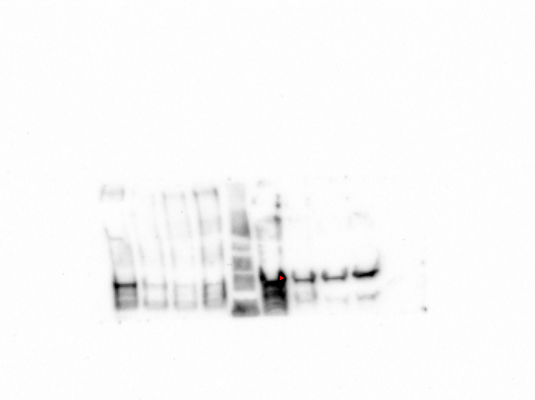


- p-STAT3

Cytoplasmatic and nuclear:
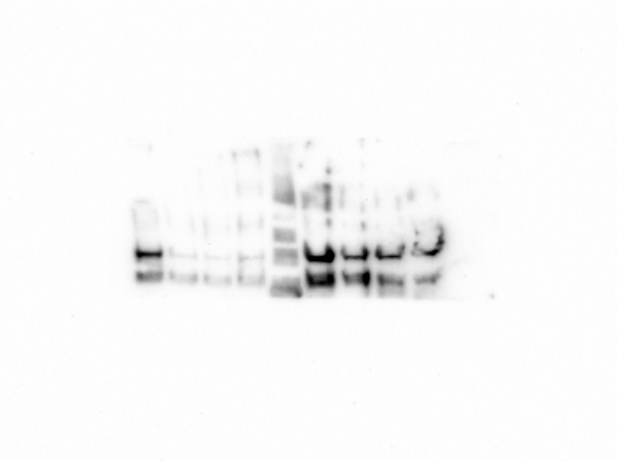


- GSK-3β non-p

Cytoplasmatic and nuclear:
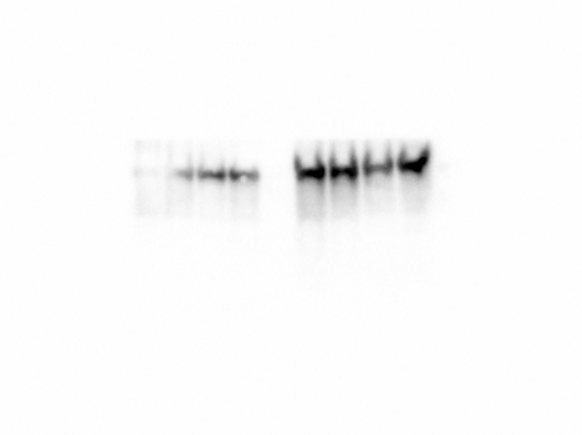


- p-GSK-3β

Cytoplasmatic and nuclear:
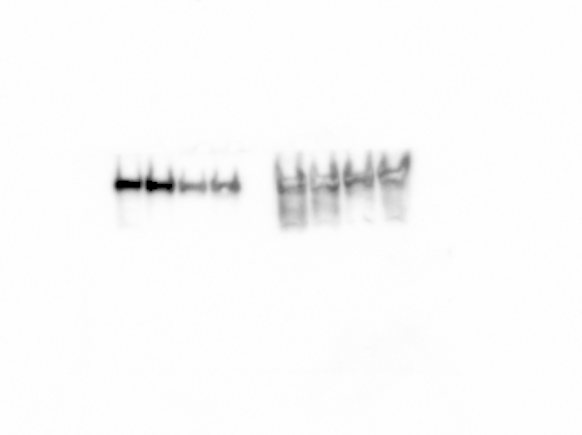


- p38 MAPK non-p

Cytoplasmatic and nuclear:
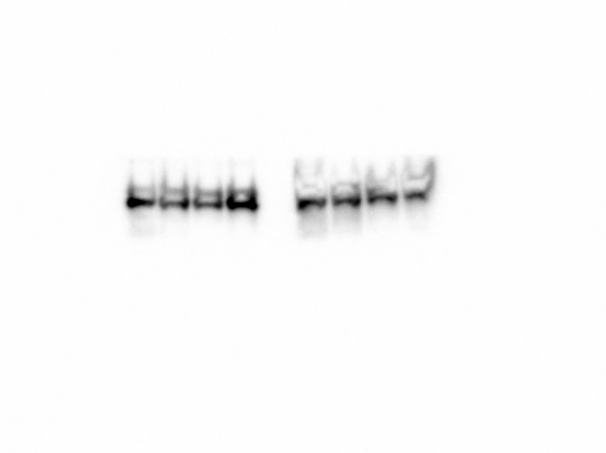


- p-p28 MAPK

Cytoplasmatic and nuclear:
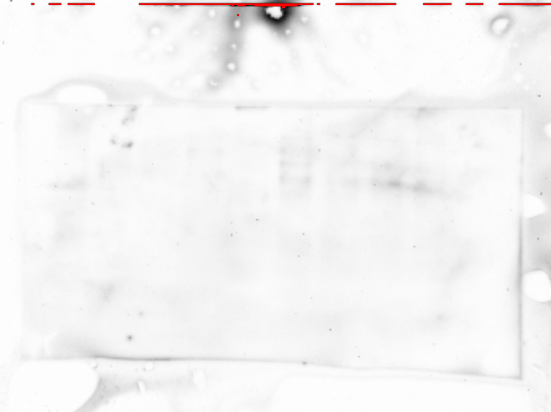


- NF-κB non-p

Cytoplasmatic and nuclear:
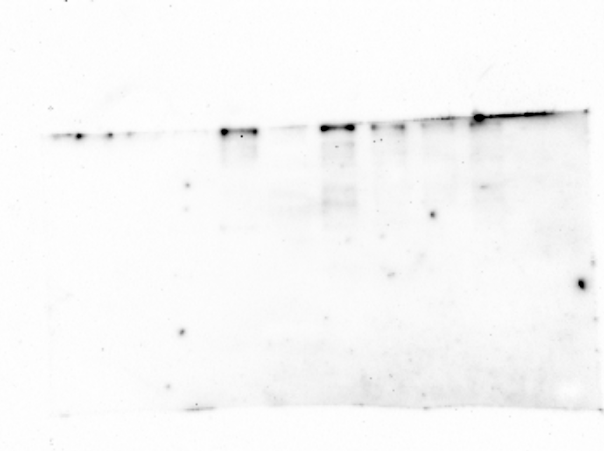


1. **Liver metastasis**

• β-actin

Cytoplasmatic and nuclear:
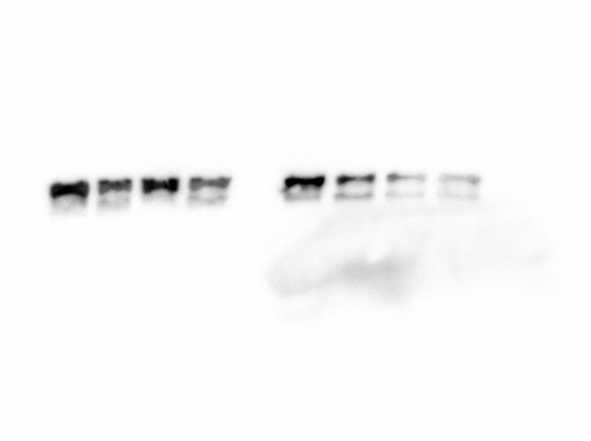


• Histone H3

Cytoplasmatic and nuclear:
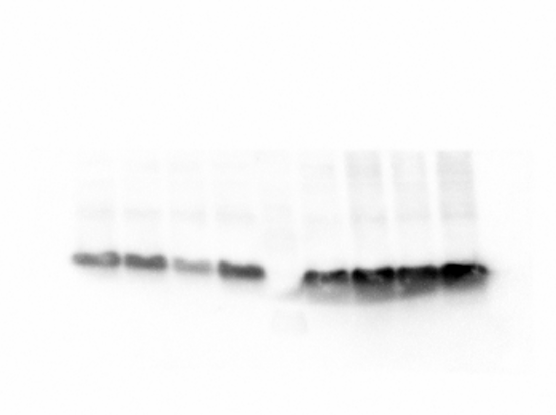


• p-β-catenin

Cytoplasmatic and nuclear:
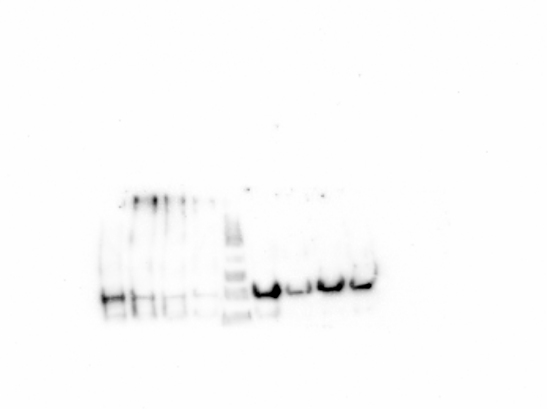


• GSK-3β non-p

Cytoplasmatic and nuclear:
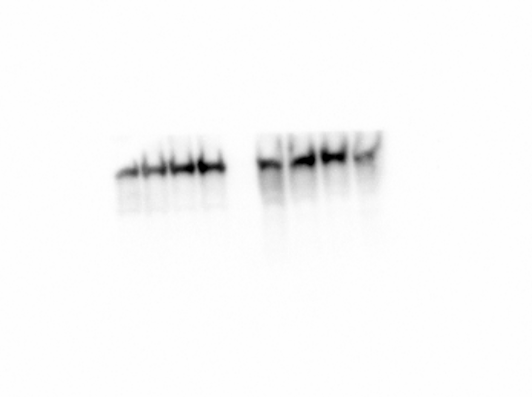


• p-GSK-3β

Cytoplasmatic and nuclear:
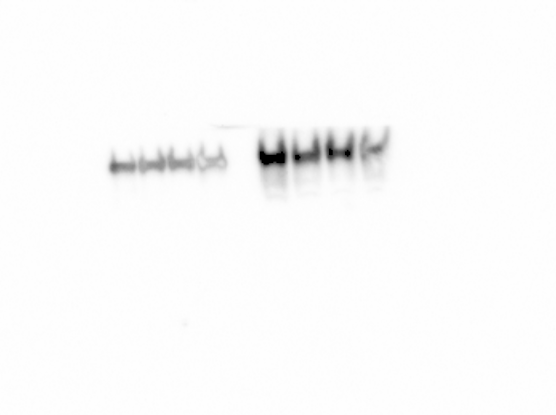


• p38 MAPK non-p

Cytoplasmatic and nuclear:
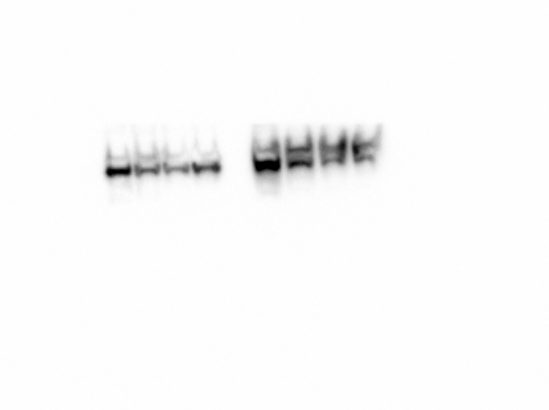


• p-p28 MAPK

Cytoplasmatic and nuclear:
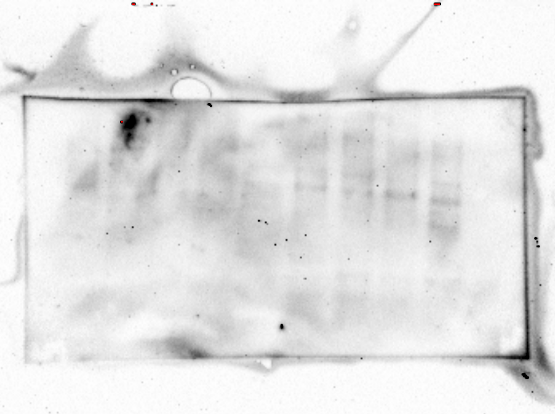


• NF-κB non-p

Cytoplasmatic and nuclear:
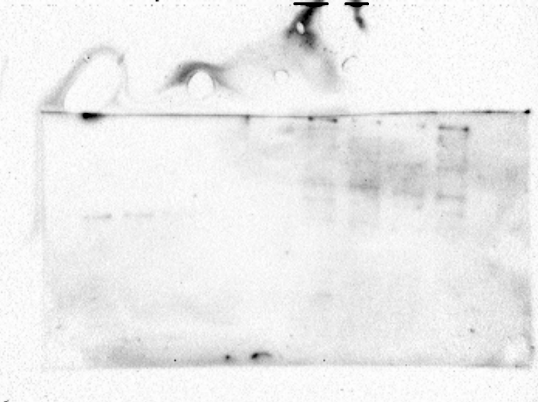


1. **Peritoneal carcinomatosis**

- β-actin

Cytoplasmatic and nuclear:
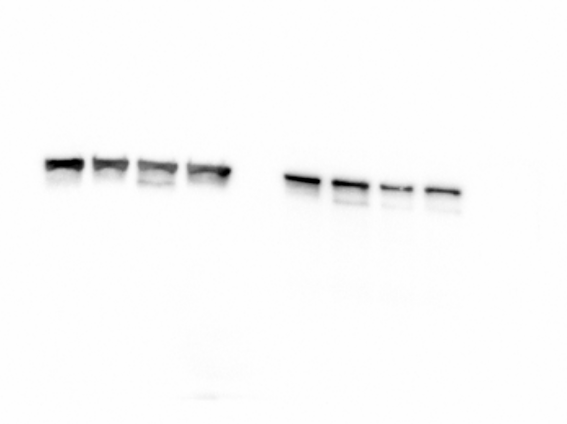


- Histone H3

Cytoplasmatic and nuclear:
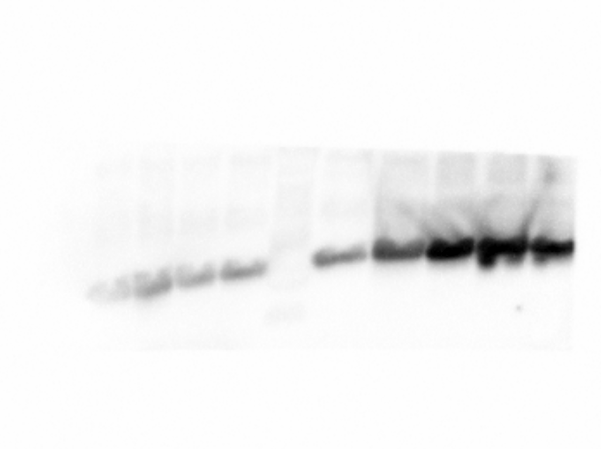


- p-β-catenin

Cytoplasmatic and nuclear:
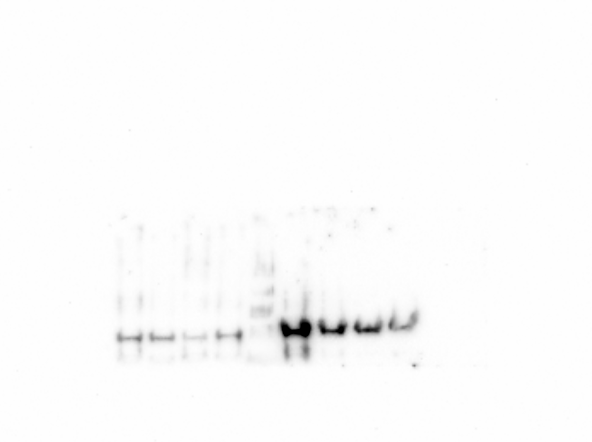


- GSK-3β non-p

Cytoplasmatic and nuclear:
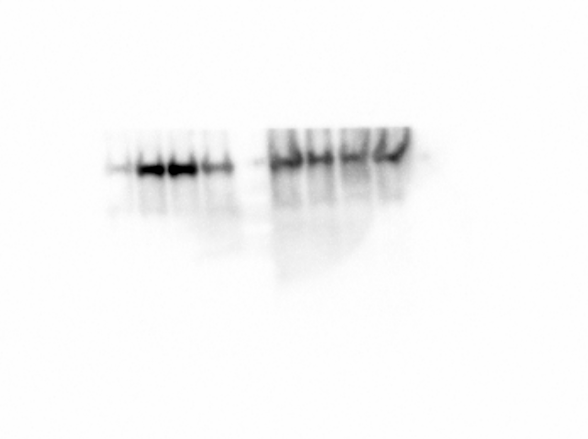


- p-GSK-3β

Cytoplasmatic and nuclear:
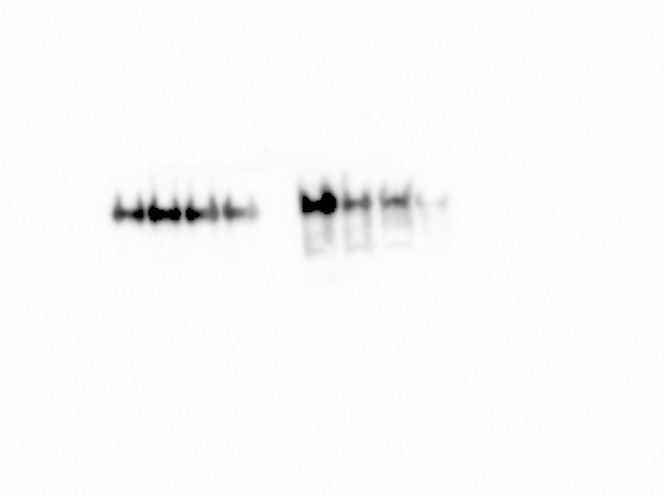


- p38 MAPK non-p

Cytoplasmatic and nuclear:
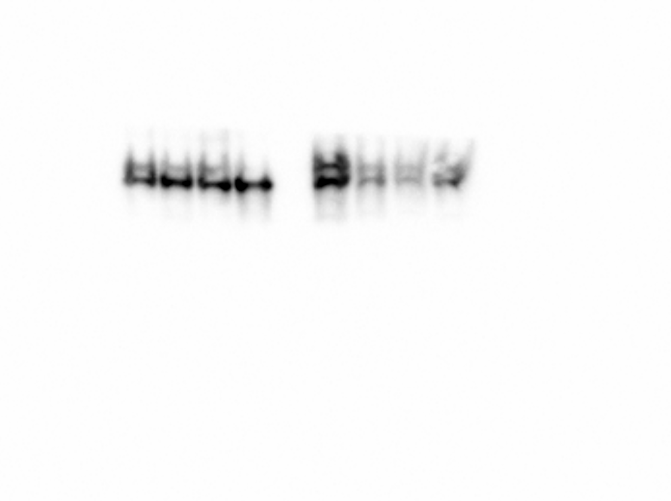


- p-p28 MAPK

Cytoplasmatic and nuclear:
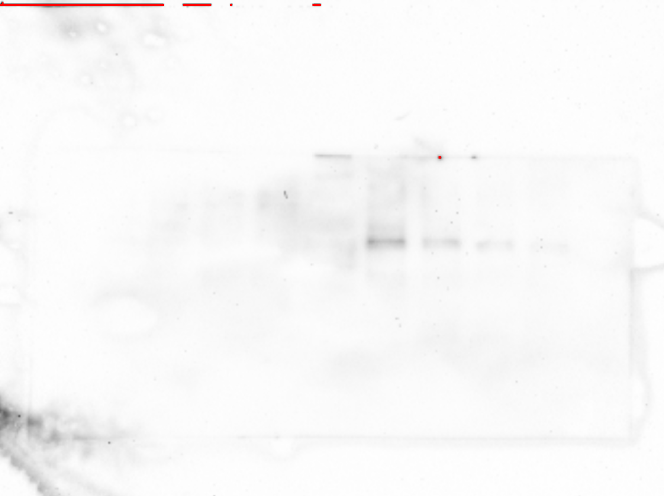


- NF-κB non-p

Cytoplasmatic and nuclear:
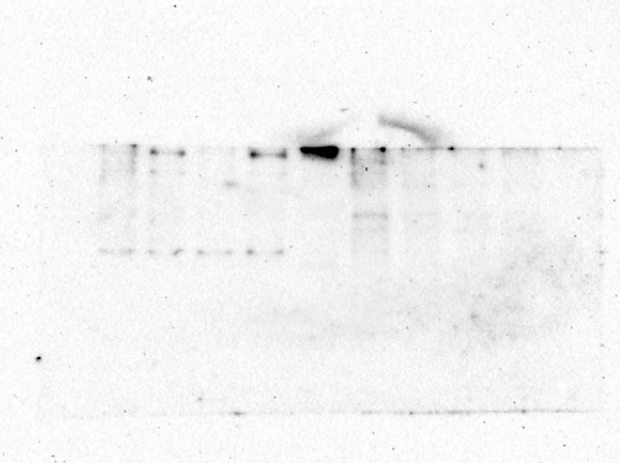


1. **Primary tumor, liver metastasis and peritoneal carcinomatosis**

- STAT1 non-p

Cytoplasmatic and nuclear:
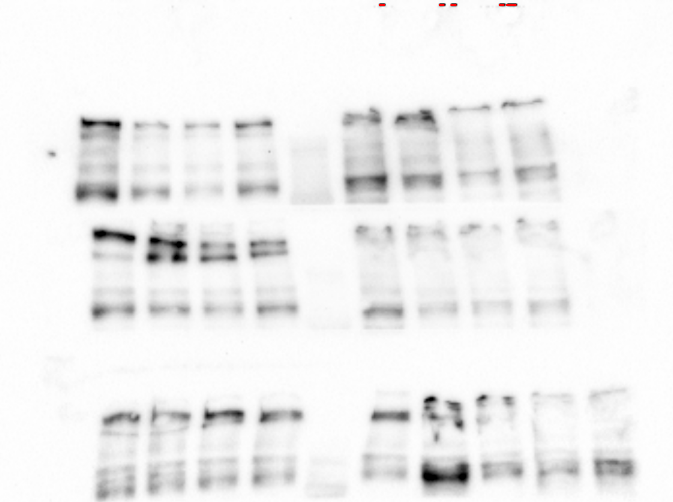


- p-STAT1

Cytoplasmatic and nuclear:
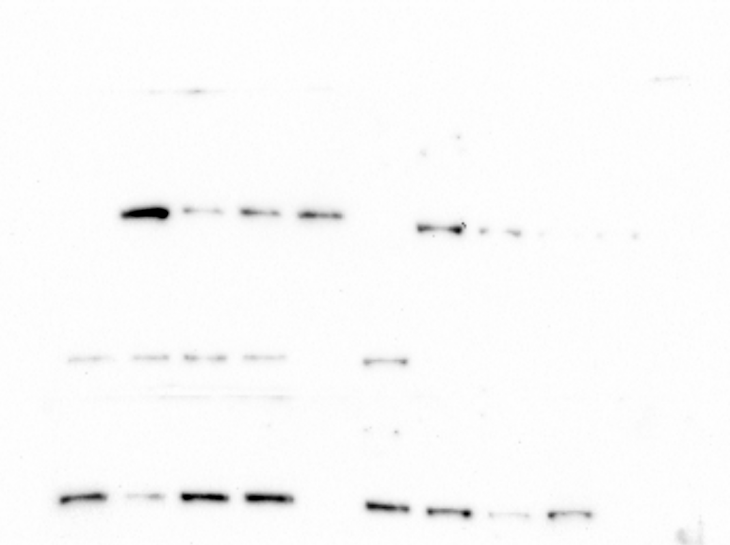


- STAT-3 non-p

Cytoplasmatic and nuclear:
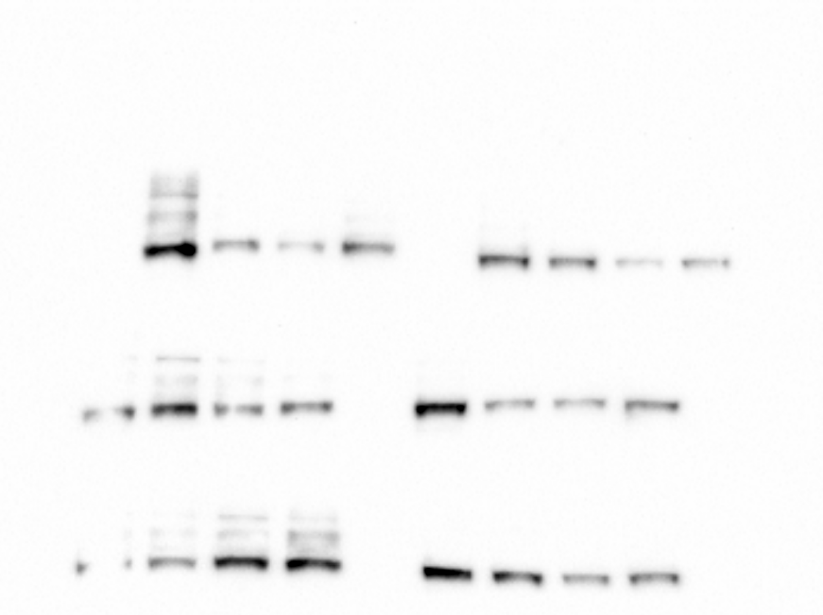


- β-catenin non-p

Cytoplasmatic and nuclear:
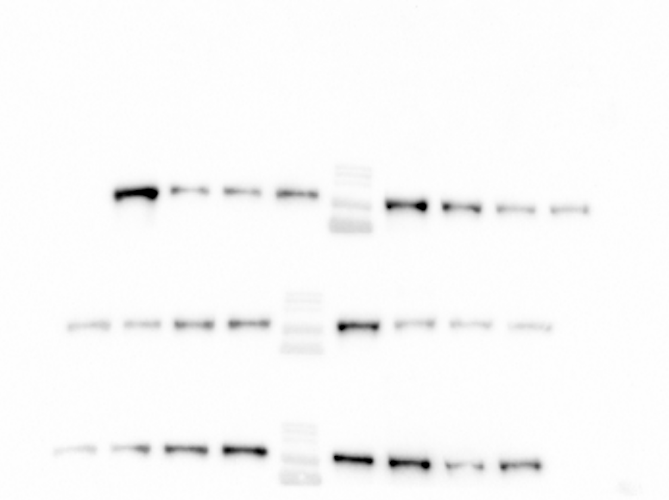


1. **Liver metastasis and peritoneal carcinomatosis**

- p-STAT-3

Cytoplasmatic and nuclear:
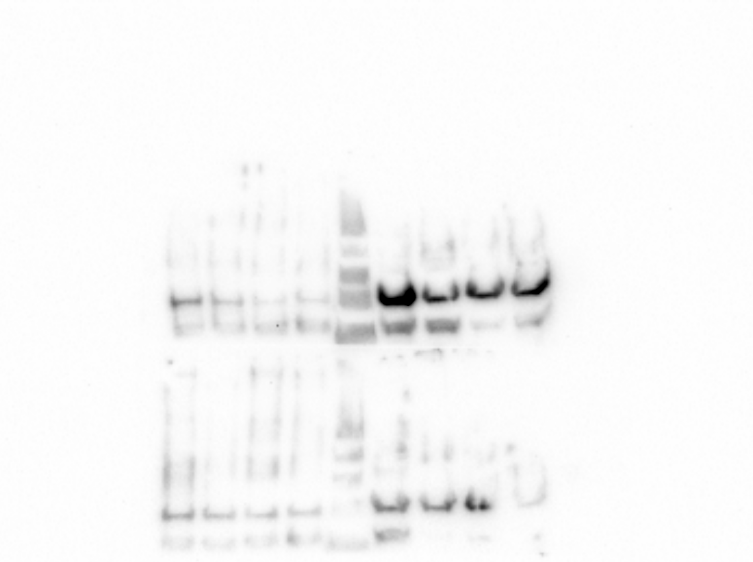

Supplement: Supplementary file 2 [file 727ff7d8b3b6e348c0c4b0f0.docx]
