# Supplementary material
Source: Research Square preprint supplement (doi:10.21203/rs.3.rs-10047645/v1)
Supplement: Supplementary file 1 [file 33199f6de9ce212233dcaddf.pdf]

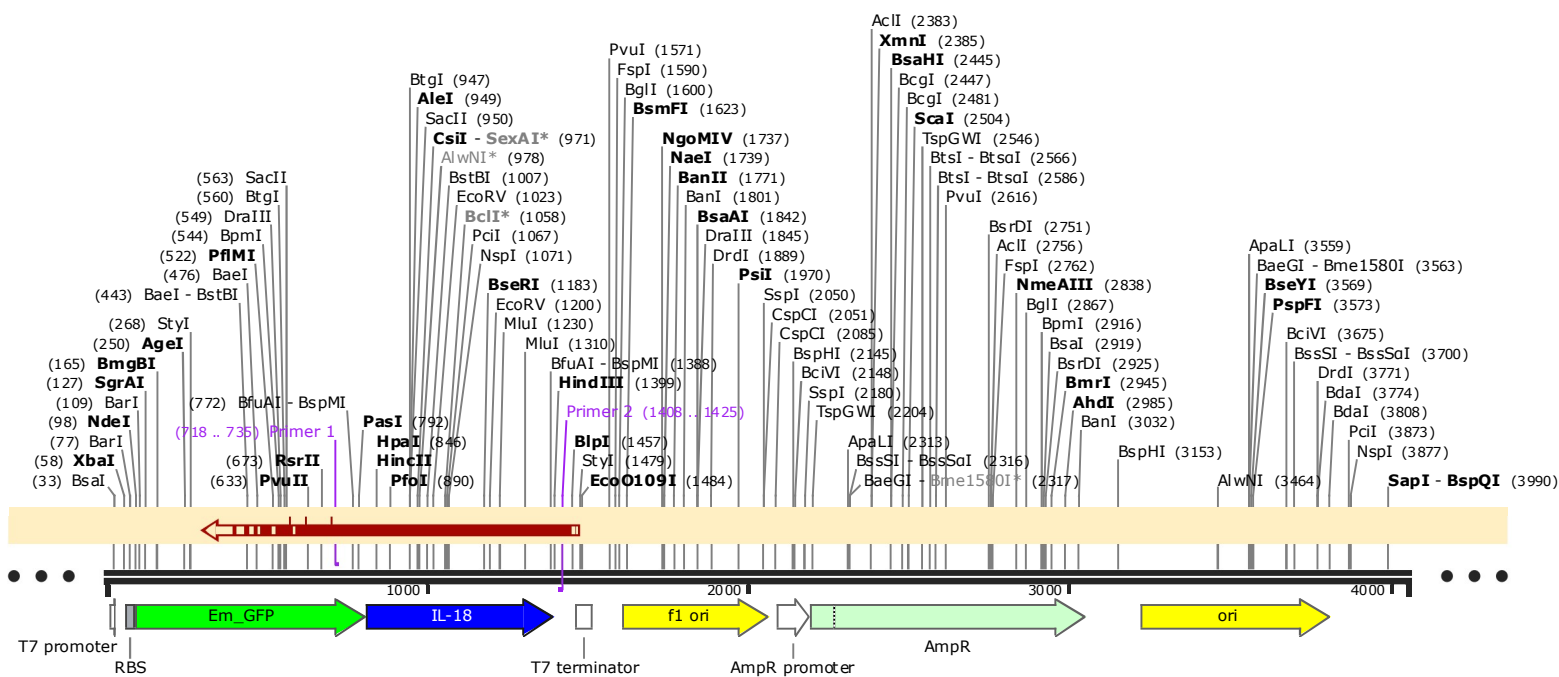

**pAE\_EmGFP\_IL18\_(cloned\_-\_seq\_sintese)**  
4053 bp

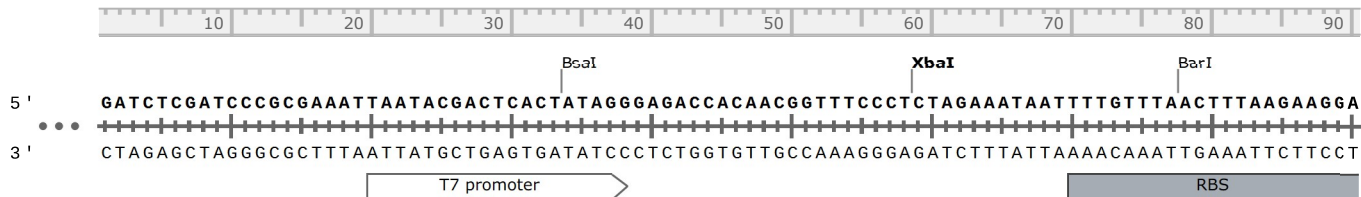

GATCTCGATCCCGCAAATTAATACGACTCACTATAGGGAGACCACAACGGTTTCCTCTAGAAATAATTTTGTTTAACTTTAAGAAGGA

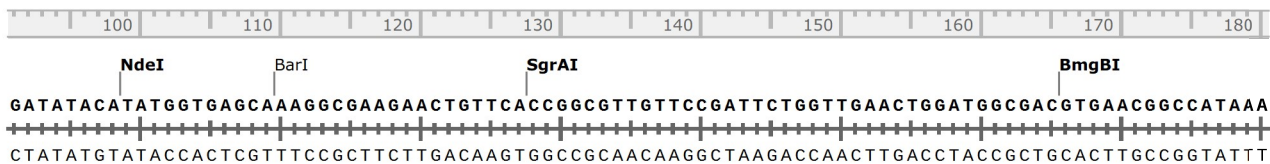

GATATACATATGGTGAGCAAAGGCCGAAGAAGCTGTTACCGGCGTTGTTCCGATTCTGTTGAACTGGATGGCGACGTGAACGGCCATAAA

CTATATGTATACCACTCGTTTCCGCTTCTTGACAAGTGCCCGCAACAAGGCTAAGACCAACTTGACCTACCGCTGCACCTGCCGGTATT

Met Val Ser Lys Gly Glu Glu Leu Phe Thr Gly Val Pro Ile Leu Val Glu Leu Asp Gly Asp Val Asn Gly His Lys

GATATACATATGGTGAGCAAAGGCCGAAGAAGCTGTTACCGGCGTTGTTCCGATTCTGTTGAACTGGATGGCGACGTGAACGGCCATAAA

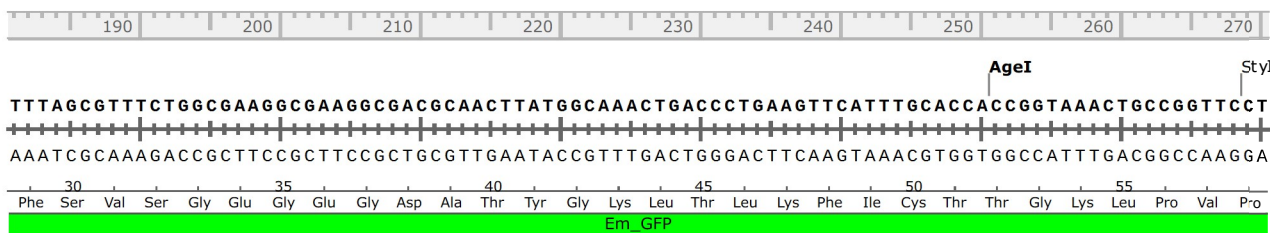

TTTAGCGTTTCTGGCGAAGGCCGAAGGCCGACGCAACTTATGGCAAAGTTCACCTGAAAGTTCATTTGCACCACCGGTAAACTGCCGGTTTCCT

AAATCGCAAAGACCGCTTCCGCTTCCGCTGCTTGAATACGTTTGACTGGGACTTCAAGTAAACGTTGGTGCCATTTGACGGCCAAGGA

Phe Ser Val Ser Gly Glu Gly Glu Asp Ala Thr Tyr Gly Lys Leu Thr Leu Lys Phe Ile Cys Thr Thr Gly Lys Leu Pro Val Pro

TTTAGCGTTTCTGGCGAAGGCCGAAGGCCGACGCAACTTATGGCAAAGTTCACCTGAAAGTTCATTTGCACCACCGGTAAACTGCCGGTTTCCT

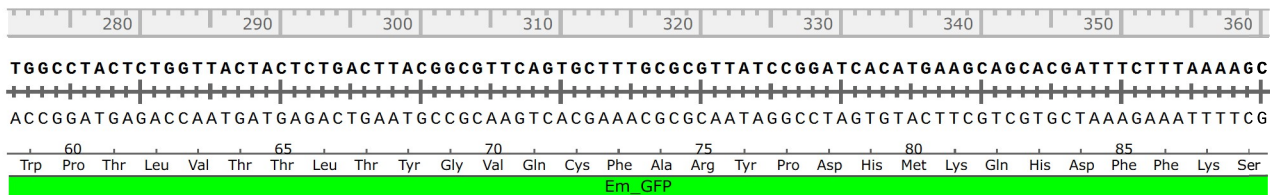

TGGCCTACTCTGGTTACTACTCTGACTTACGGCGTTCAAGTGCCTTTCGCGGTTATCCGGATCACATGAAGCAGCACGATTTCTTTAAAAGC

ACCGGATGAGACCAATGATGAGACTGAATGCCGAAGTCACGAAACCGCAATAGGCCCTAGTGTACTTCGTCGTCTAAAGAAATTTTCG

Trp Pro Thr Leu Val Thr Thr Leu Thr Tyr Gly Val Gln Cys Phe Ala Arg Tyr Pro Asp His Met Lys Gln His Asp Phe Phe Lys Ser

TGGCCTACTCTGGTTACTACTCTGACTTACGGCGTTCAAGTGCCTTTCGCGGTTATCCGGATCACATGAAGCAGCACGATTTCTTTAAAAGC

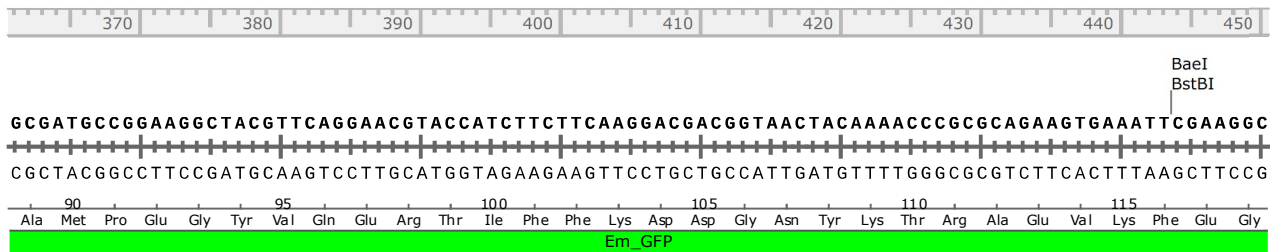

GCGATGCCGGAAGGCTACGTTACGGAACGTACCATCTTCTTCAAGGACGACGGTAACTACAAAACCCGCGCAGAAGTGAATTCGAAGGC

CGCTACGGCCTTCCGATGCAAGTCTTGCATGGTAGAAGAAGTTCTGCTGCCATTGATGTTTTGGGCGCGTCTTCACTTTAAGCTTCCG

Ala Met Pro Glu Gly Tyr Val Gln Glu Arg Thr Ile Phe Phe Lys Asp Asp Gly Asn Tyr Lys Thr Arg Ala Glu Val Lys Phe Glu Gly

GCGATGCCGGAAGGCTACGTTACGGAACGTACCATCTTCTTCAAGGACGACGGTAACTACAAAACCCGCGCAGAAGTGAATTCGAAGGC

TTTCAAGGACGACGGTAACTTCAAAAACCCGTCAGAAAGTGAATTCGAAGGC

1 ←

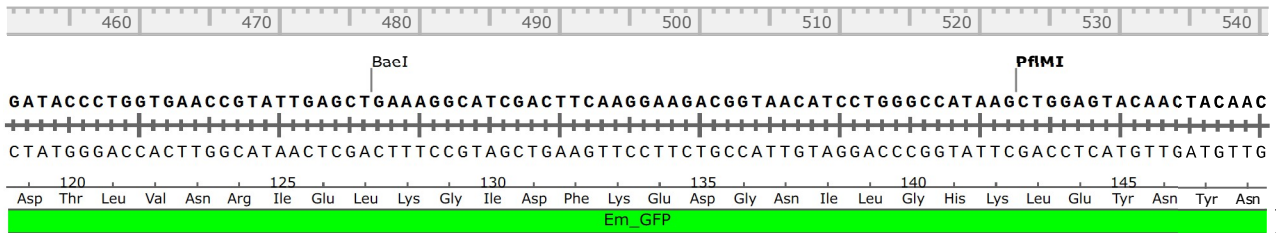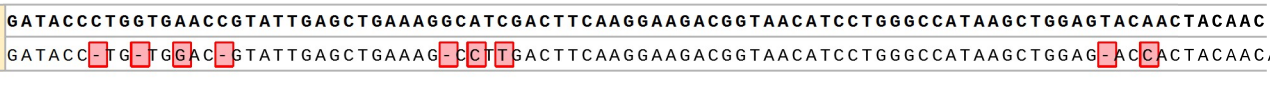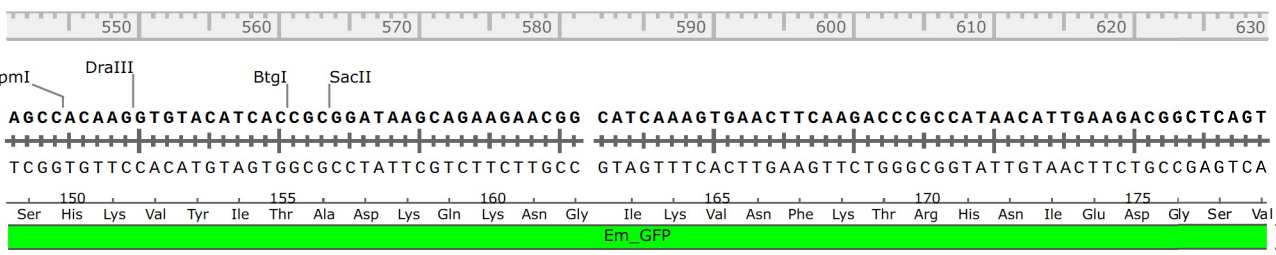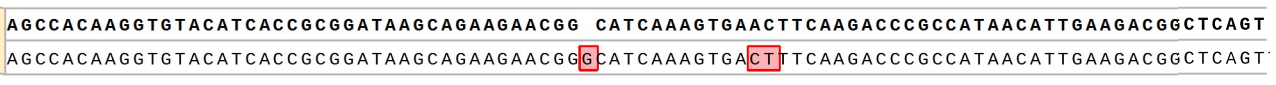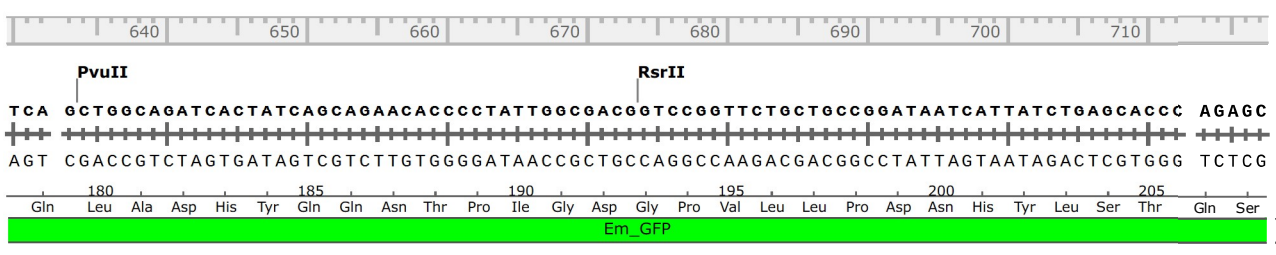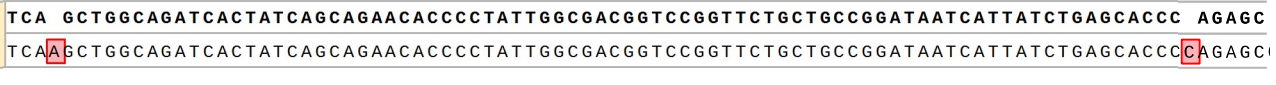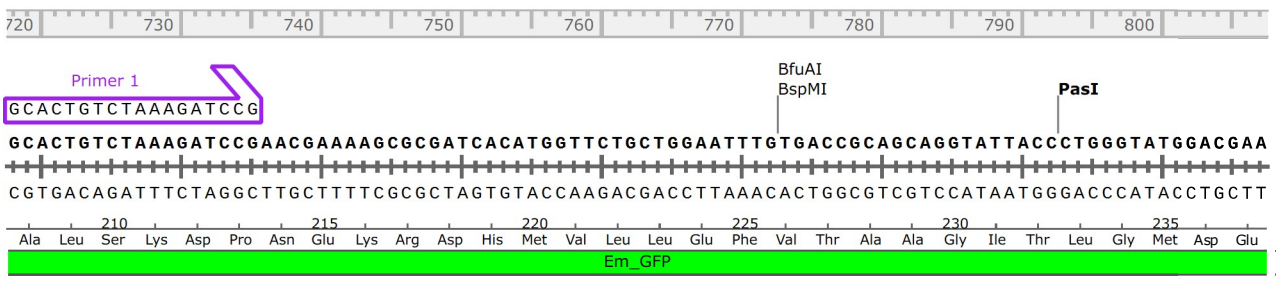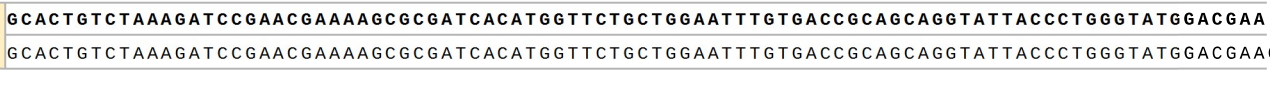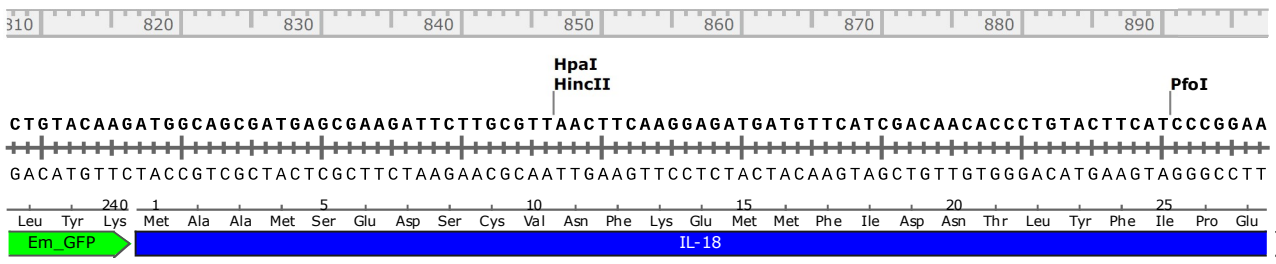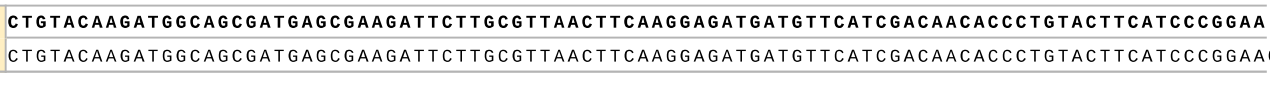

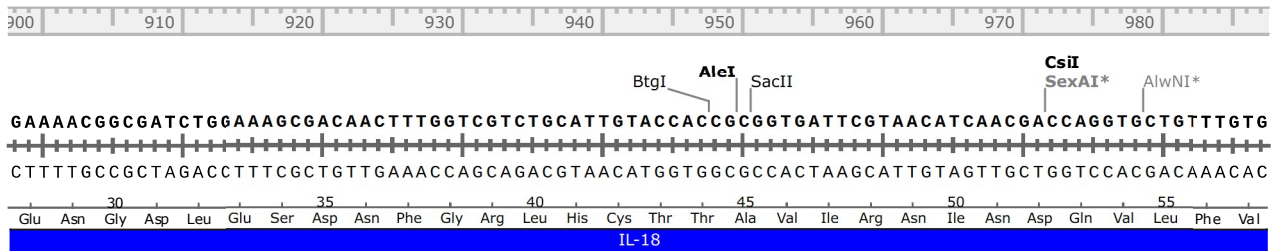

1 ← GAAAACGGCGATCTG6AAAGCGACAACCTTTGGTCTGCTGCAATTGTACCACCGCGGTGATTCGTAACATCAACGACCAGGTGCTGTTTGTG  
 GAAAACGGCGATCTG6AAAGCGACAACCTTTGGTCTGCTGCAATTGTACCACCGCGGTGATTCGTAACATCAACGACCAGGTGCTGTTTGTG

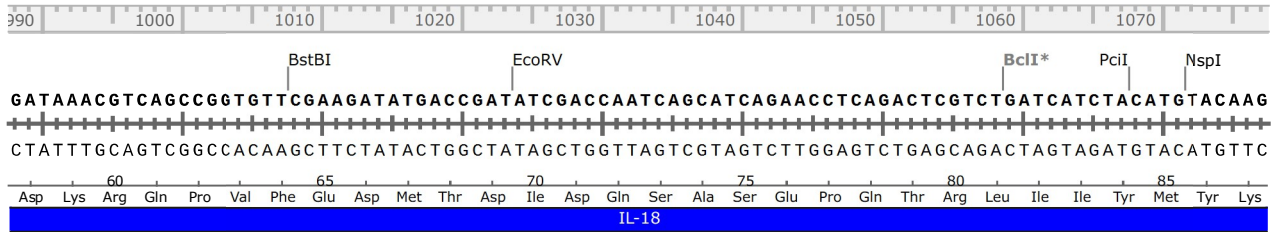

1 ← GATAAACGTCAGCCGGTGTTCGAAGATATGACCGATATCGACCAATCAGCATCAGAACCTCAGACTCGTCTGATCATCTACATGTACAAG  
 GATAAACGTCAGCCGGTGTTCGAAGATATGACCGATATCGACCAATCAGCATCAGAACCTCAGACTCGTCTGATCATCTACATGTACAAG

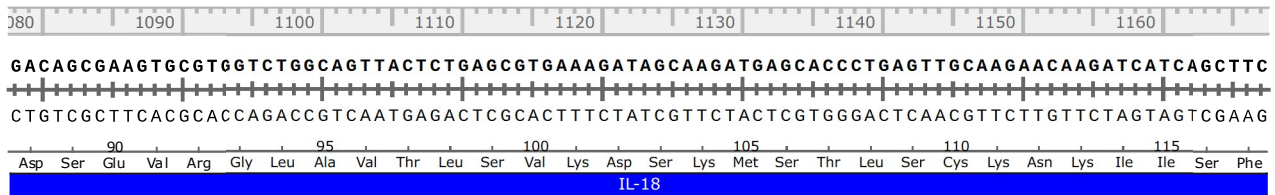

1 ← GACAGCGAAGTGCGTGGTCTGGCAGTTACTCTGAGCGTGAAAGATAGCAAGATGAGCACCTGAGTTGCAAGAACAAGATCATCAGCTTC  
 GACAGCGAAGTGCGTGGTCTGGCAGTTACTCTGAGCGTGAAAGATAGCAAGATGAGCACCTGAGTTGCAAGAACAAGATCATCAGCTTC

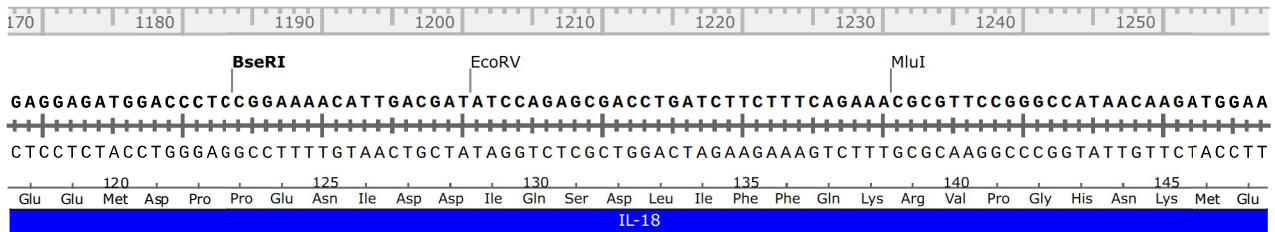

1 ← GAGGAGATGGACCCTCCGAAAACATTGACGATATCCAGAGCGACCTGATCTTCTTTTCAGAAACGCGTTCCGGGCCATAACAAGATGGAA  
 GAGGAGATGGACCCTCCGAAAACATTGACGATATCCAGAGCGACCTGATCTTCTTTTCAGAAACGCGTTCCGGGCCATAACAAGATGGAA

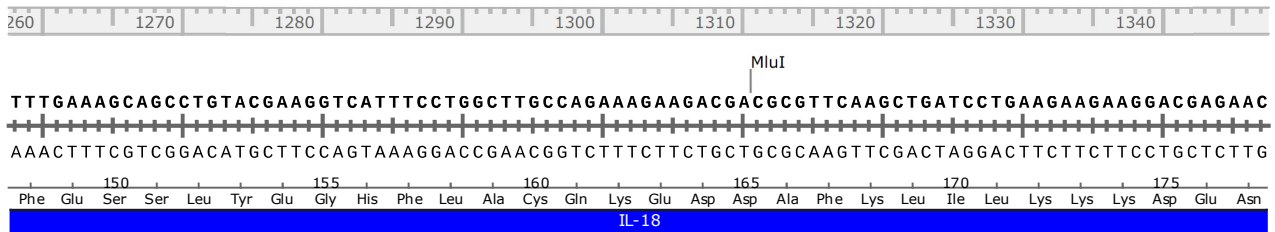

1 ← TTTGAAGCAGCCTGTACGAAGGTCATTTCTGGCTTGCCAGAAAAGAAGACGACGCGTTCAAGCTGATCCTGAAGAAGAAGGACGAGAAC  
 TTTGAAGCAGCCTGTACGAAGGTCATTTCTGGCTTGCCAGAAAAGAAGACGACGCGTTCAAGCTGATCCTGAAGAAGAAGGACGAGAAC

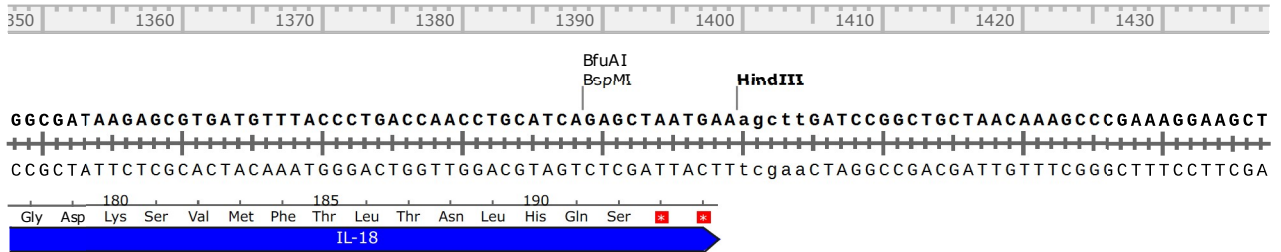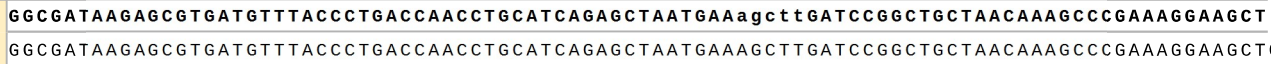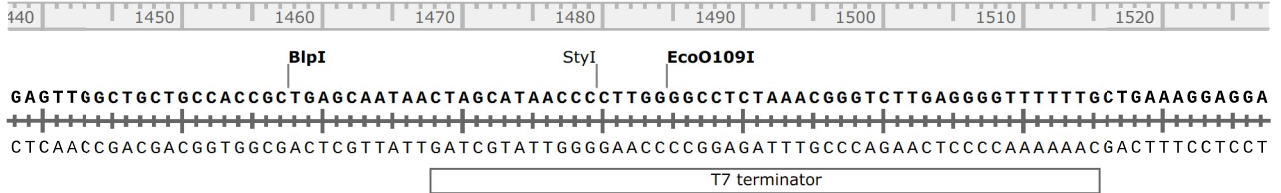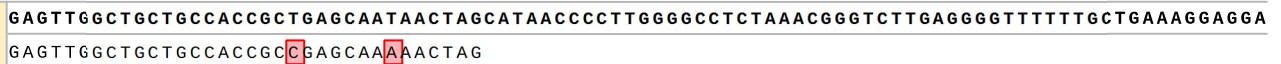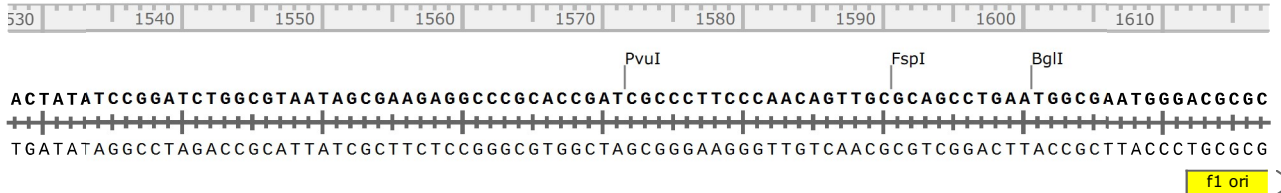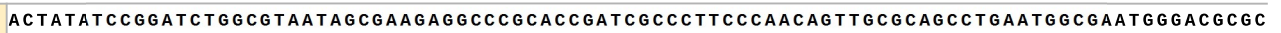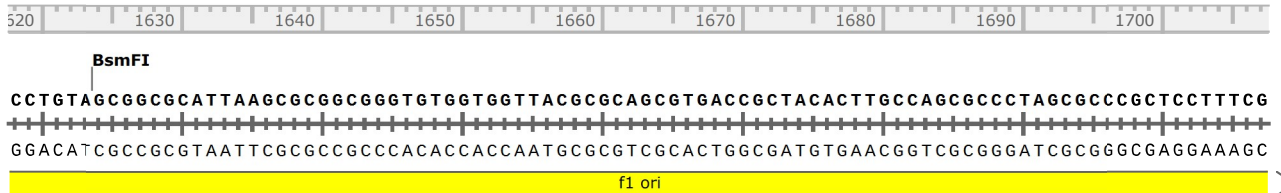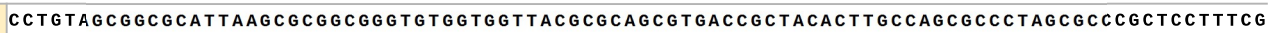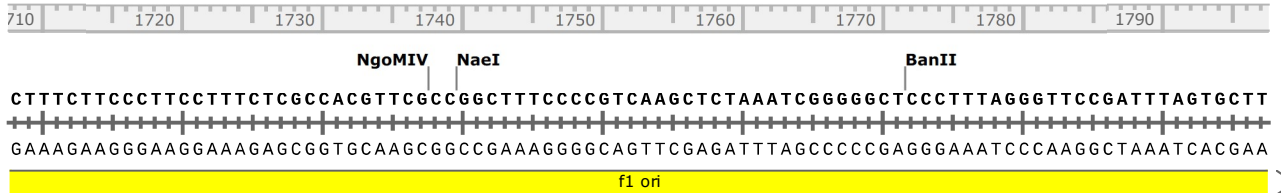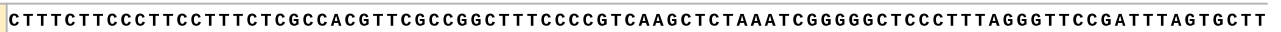

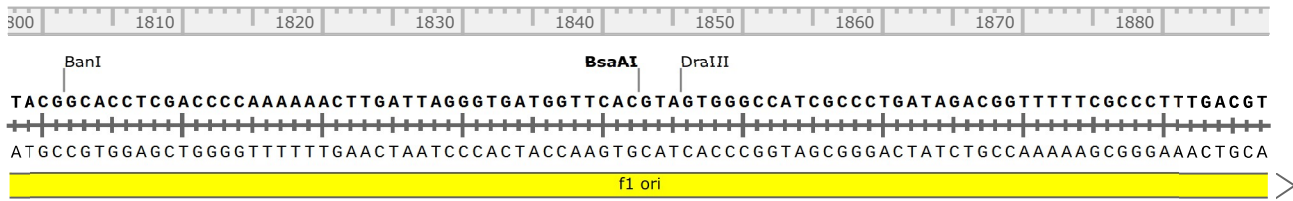

TACGGCACCTCGACCCCAAAAACTTGATTAGGGTGATGGTTCACGTAGTGGGCCATCGCCCTGATAGACGGTTTTTCGCCCTTTGACGT

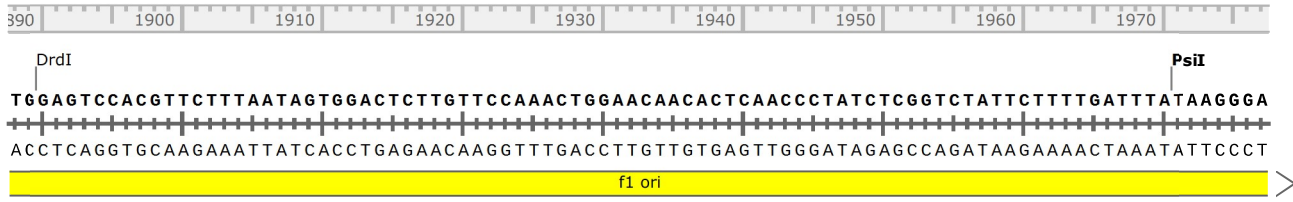

TGGAGTCCACGTTCTTTAATAGTGGACTCTTGTTCCAAACCTGGAACAACACTCAACCCTATCTCGGTCTATTCTTTGATTTATAAGGGA

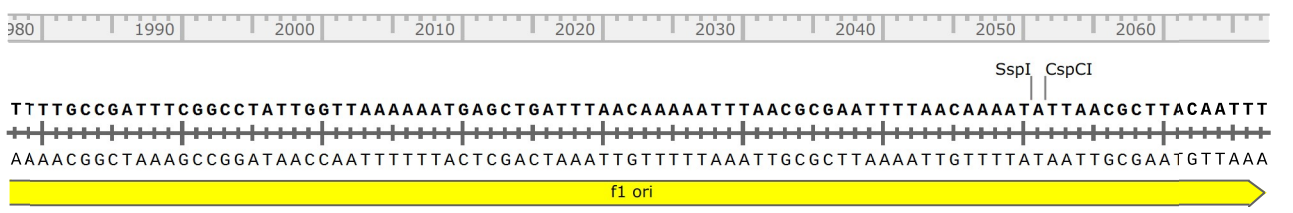

TTTTGCCGATTTTCGGCCTATTGGTTAAAAAATGAGCTGATTTAACAAAAATTAACGCGAATTTTAACAAAATATTAACGCTTACAATTT

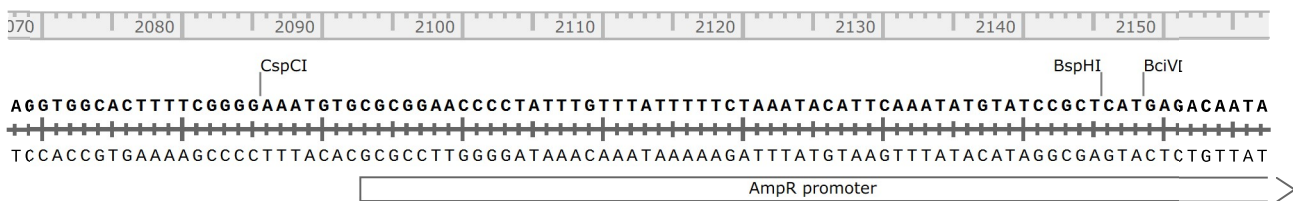

AGGTGGCACTTTTCGGGGAAATGTGCGCGGAACCCCTATTTGTTTATTTTTCTAAATACATTCAAATATGTATCCGCTCATGAGACAATA

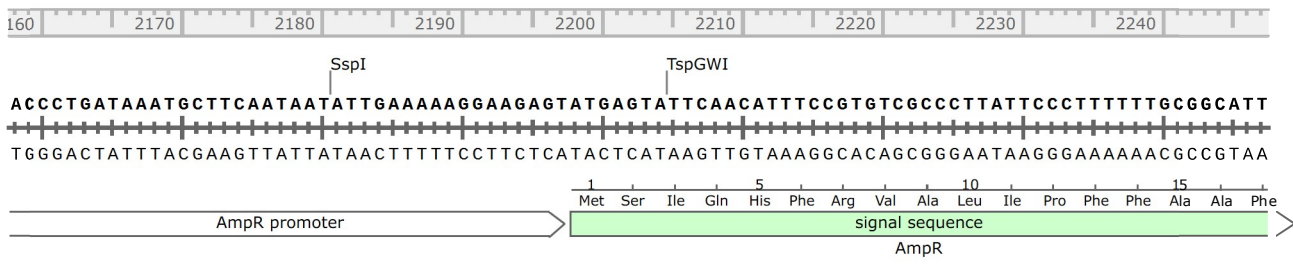

ACCCTGATAAATGCTTCAATAATATTGAAAAAGGAAGAGTATGAGTATTCAACATTTCCGTGTCGCCCTTATTCCCTTTTTTGCGGCATT

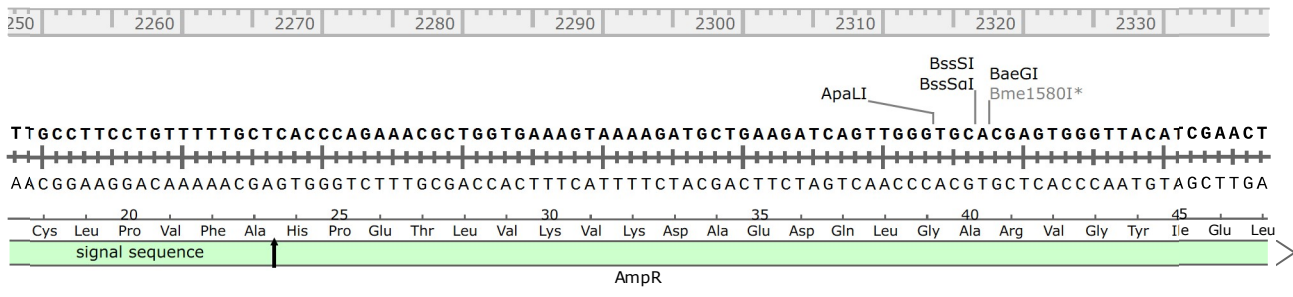

TGCTTCTCTGTTTTGCTCACCCAGAAACGCTGGTGAAGTAAAAGATGCTGAAGATCAGTTGGGTGCACGAGTGGGTTACATCGAACT

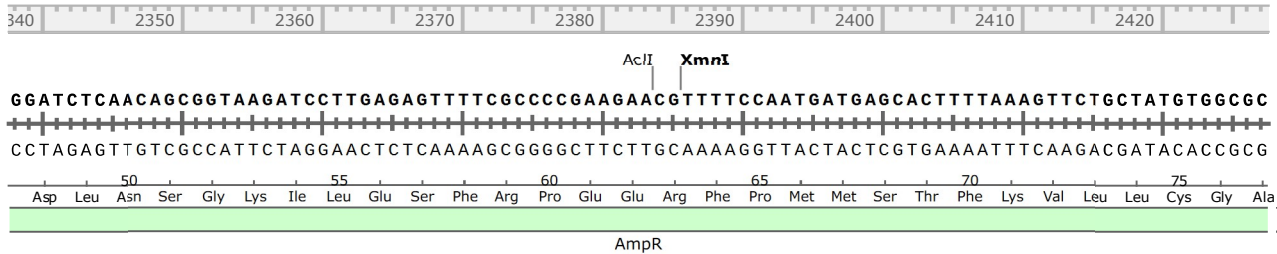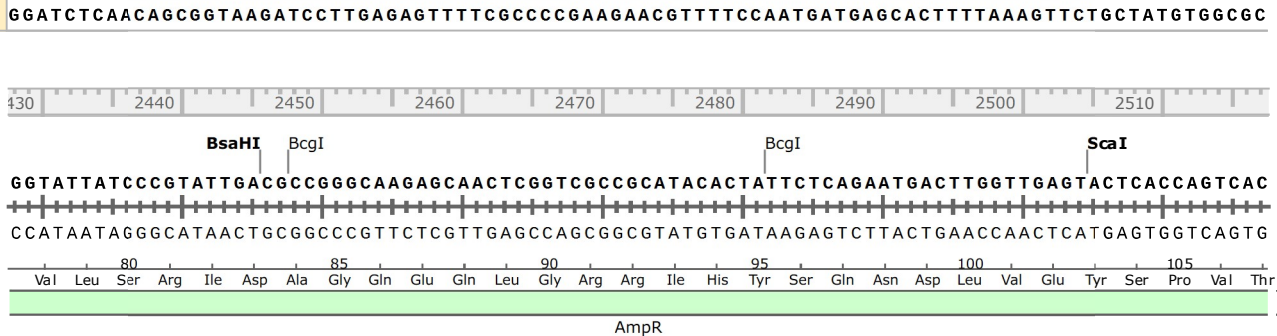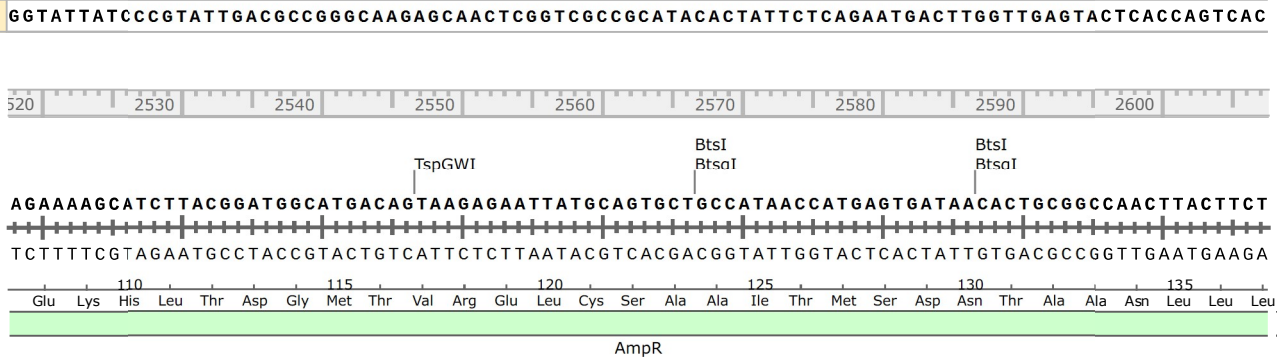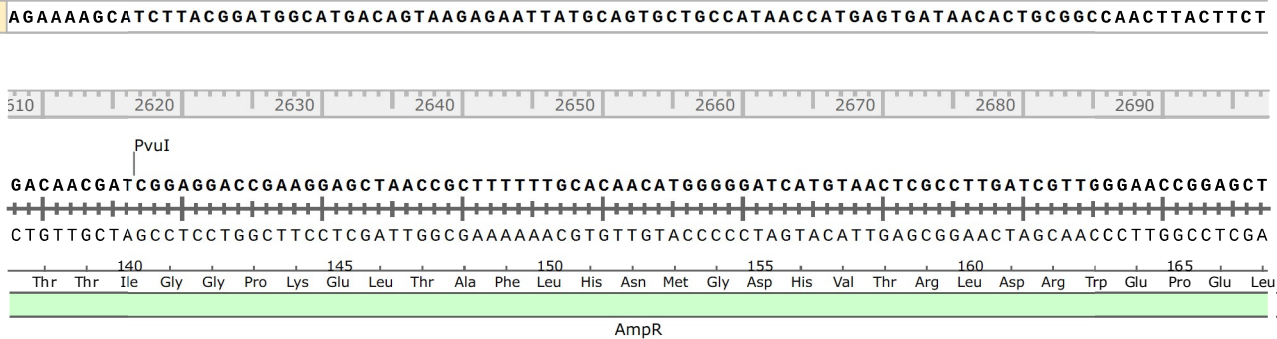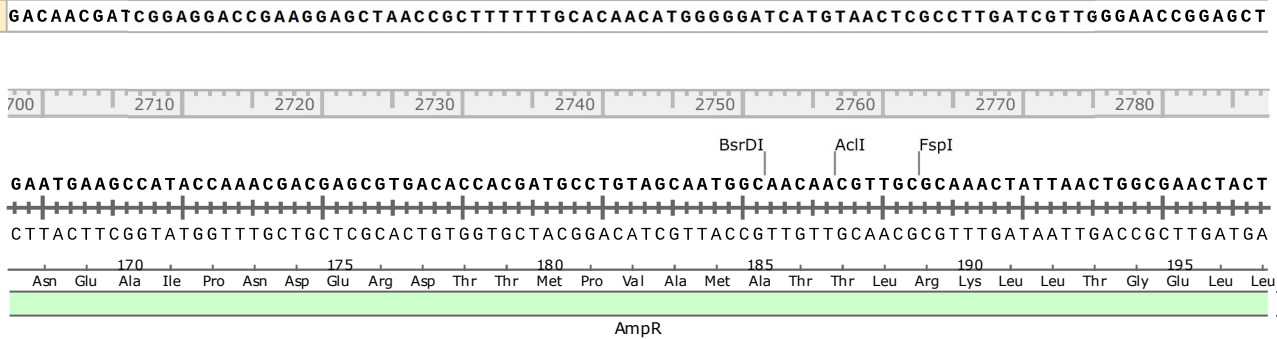

GAATGAAGCCATACCAAACGACGAGCGTGACACCACGATGCCTGTAGCAATGGCAACAACGTTGCGCAAACCTATTAAGTGGCGAACTACT

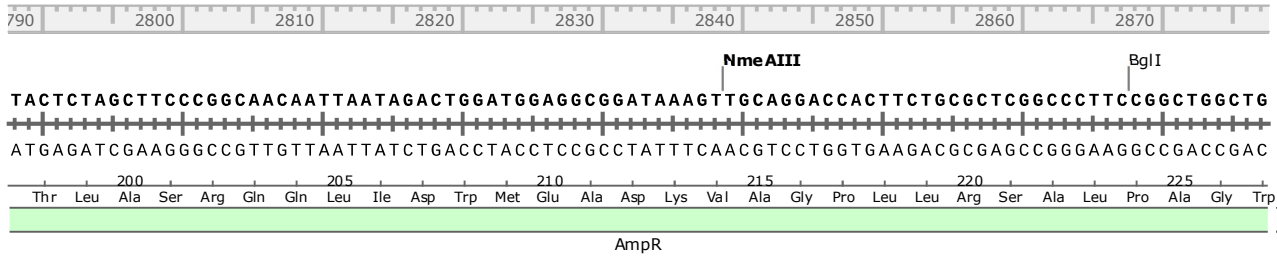

TACTCTAGCTTCCCGGCAACAATTAATAGACTGGATGGAGGCGGATAAAGTTGCAGGACCACCTTCTGCGCTCGGCCCTTCCGGCTGGCTG

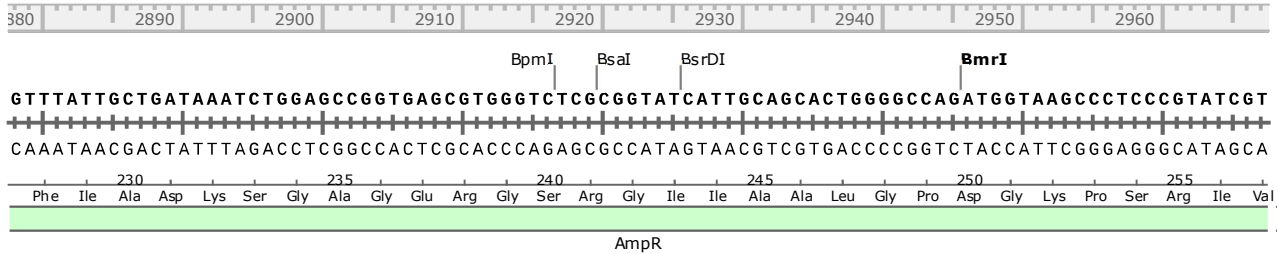

GTTTATTGCTGATAAATCTGGAGCCGGTGAGCGTGGGTCTCGCGGTATCATTGCAGCACTGGGGCCAGATGGTAAGCCCTCCCGTATCGT

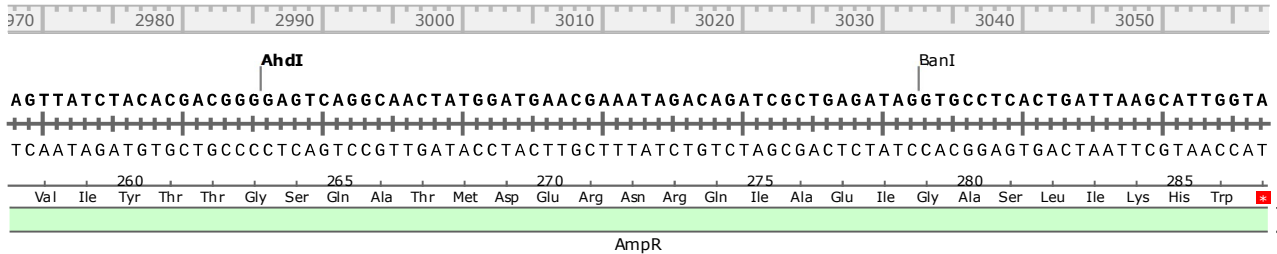

AGTTATCTACACGACGGGGAGTCAGGCAACTATGGATGAACGAAATAGACAGATCGCTGAGATAGGTGCCTCACTGATTAAGCATTGGTA

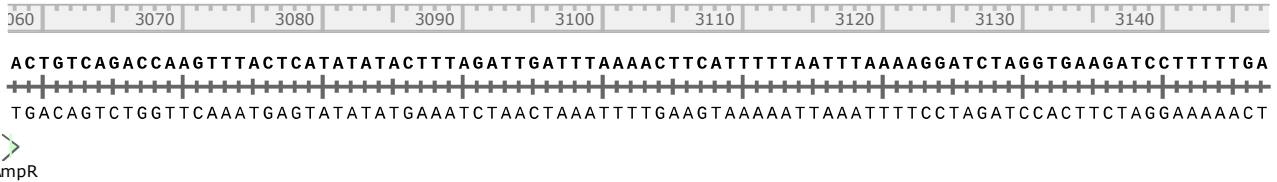

ACTGTCAGACCAAGTTTACTCATATATACTTTAGATTGATTTAAAACCTTCATTTTTAATTTAAAAGGATCTAGGTGAAGATCCTTTTTGA

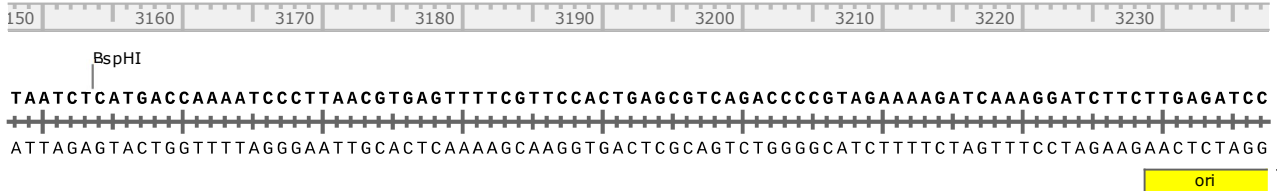

TAACTCATGACCAAAATCCCTTAACGTGAGTTTTCGTTCCACTGAGCGTCAGACCCCGTAGAAAAGATCAAAGGATCTTCTTGAGATCC

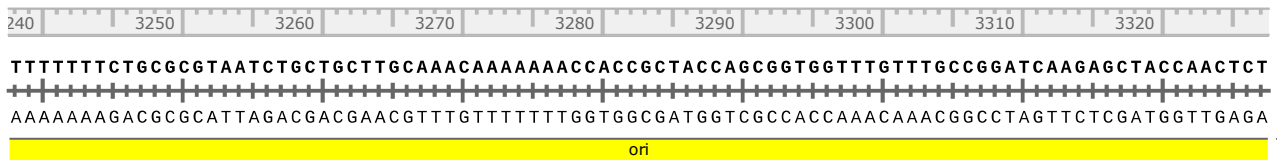

TTTTTTTCTGCGGTAATCTGCTGCTTGCAAACAAAAAACACCGCTACCAGCGGTGGTTTGGTTTGGCGGATCAAGAGCTACCAACTCT

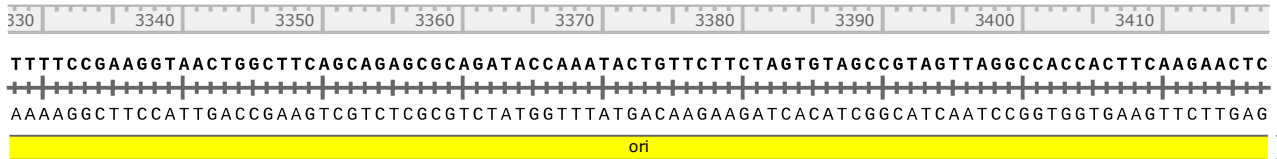

TTTTCCGAAGGTAAGTGGCTTCAGCAGAGCGCAGATACCAAATACTGTTCTTCTAGTGTAGCCGTAGTTAGGCCACCACCTTCAAGAAGTCT

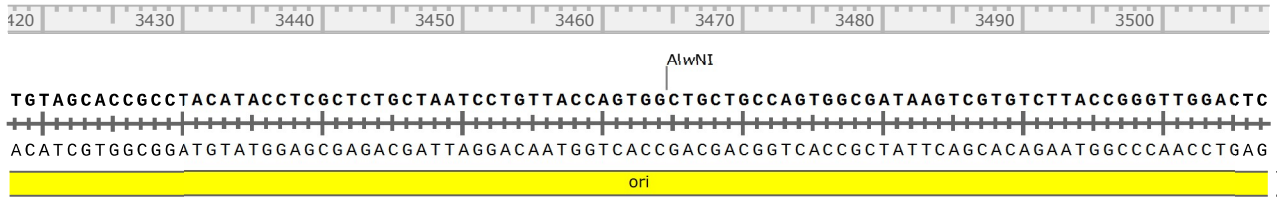

TGTAGCACCAGCTACATACCTCGCTCTGCTAATCCTGTTACCAAGTGGCTGCTGCCAGTGGCGATAAGTCTGTCTTACCGGGTTGGACTC

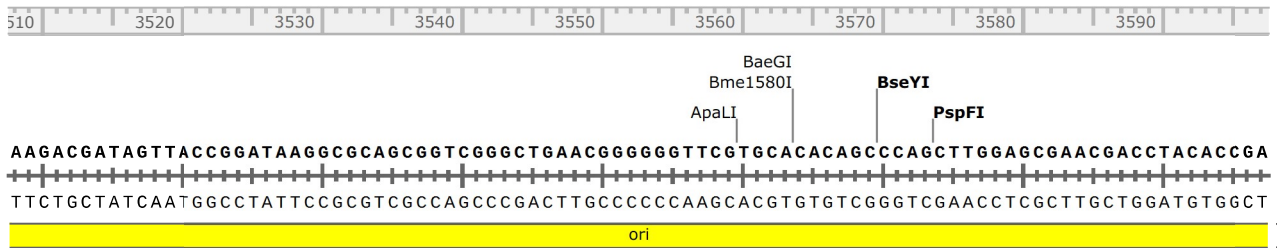

AAGACGATAGTTACCGGATAAGGCGCAGCGGTCGGGCTGAACGGGGGGTTCGTGCACACAGCCAGCTTGGAGCGAACGACCTACACCGA

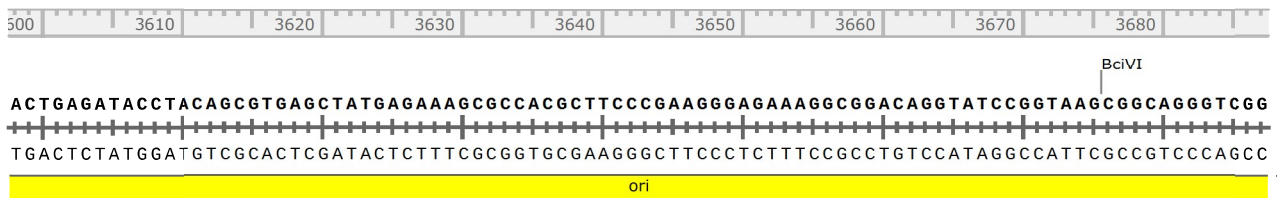

ACTGAGATACCTACAGCGTGAGCTATGAGAAAGCGCCACGCTTCCCGAAGGGAGAAAGGCGGACAGGTATCCGGTAAGCGGCAAGGGTCGG

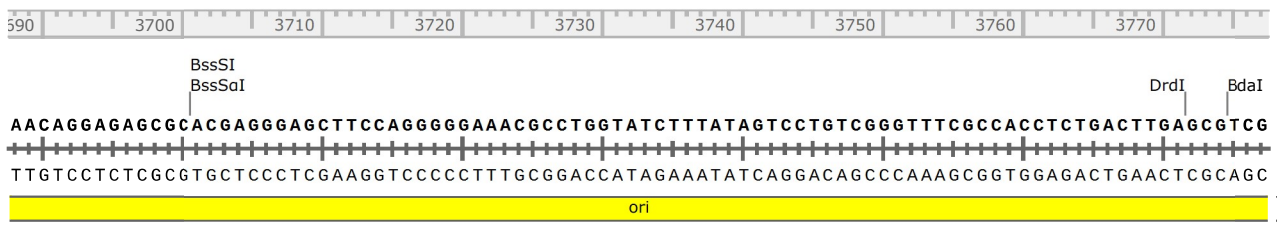

AACAGGAGAGCGCACGAGGGAGCTTCCAGGGGAAACGCTGGTATCTTTATAGTCTGTCGGGTTTCGCCACCTCTGACTTGAGCGTCTG

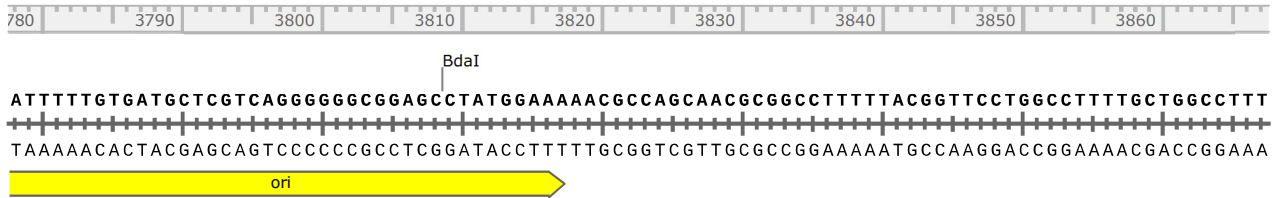

ATTTTGTGATGCTCGTCAGGGGGCGGAGCCTATGGAAAAACGCCAGCAACGCGGCCTTTTTACGGTTCTTGGCCTTTTGTGGCCTTTT

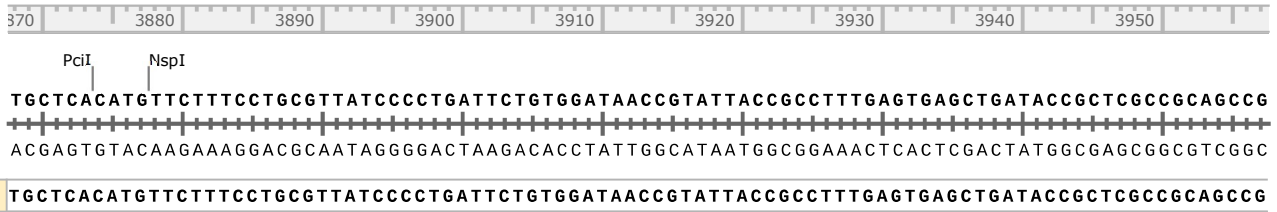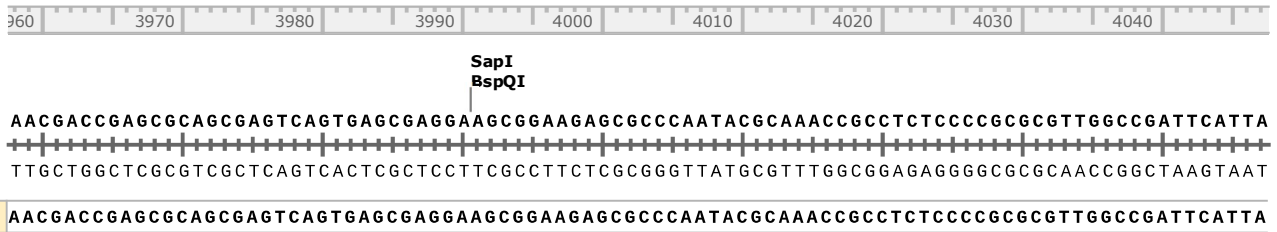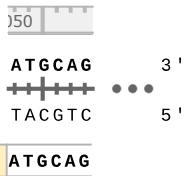

Original Sequence: pAE\_EmGFP\_IL18\_(cloned\_-\_seq\_sintese).dna  
 1 .. 4053

5-pAE-proll-18-EmGFP-SS-466-Seq-pAE-R\_G05 ←  
 1174 bases / 10 Apr 2024  
 14 .. 1085 (13 mismatches, 9 gaps)

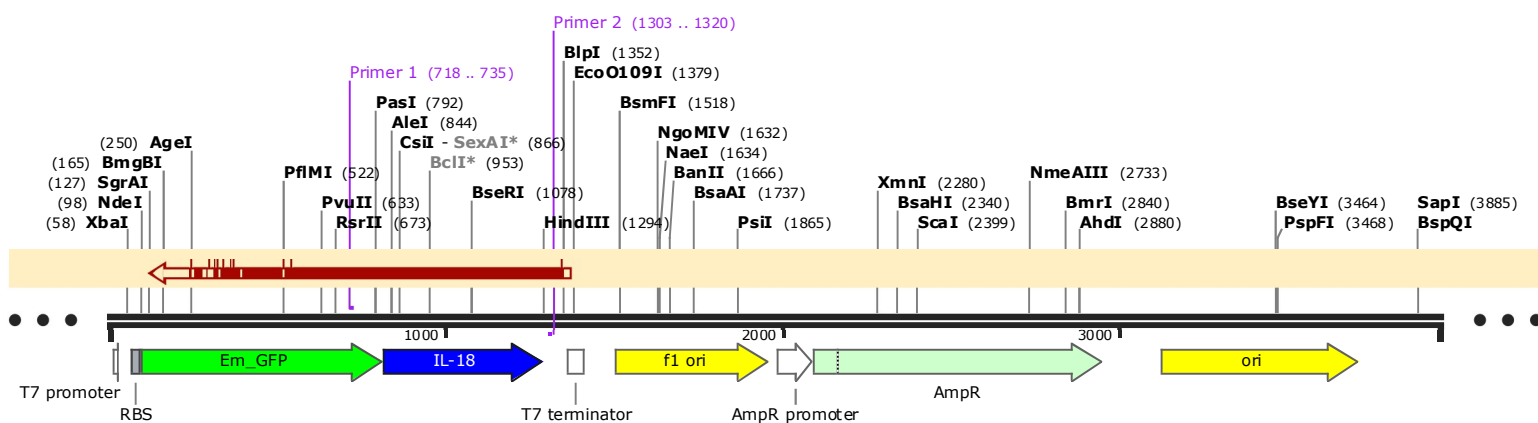

**pAE\_EmGFP\_IL18\_ativa\_(cloned\_-\_seq\_sintese)**  
3948 bp

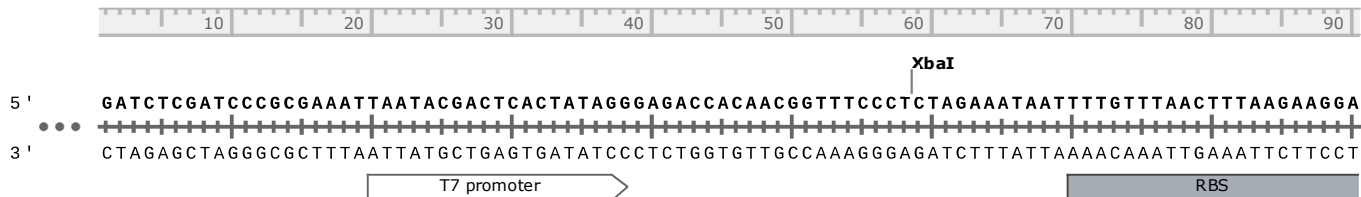

5' GATCTCGATCCCGCGAAATTAATACGACTCACTATAGGGAGACCACAACGGTTTCCCTCTAGAAATAATTTTGTTTAACTTTAAGAAGGA  
 3' CTAGAGCTAGGGCGCTTTAATTATGCTGAGTGATATCCCTCTGGTGTGGCAAAGGGAGATCTTTATTAACAACAAATTGAAATTCCTCT

T7 promoter

RBS

GATCTCGATCCCGCGAAATTAATACGACTCACTATAGGGAGACCACAACGGTTTCCCTCTAGAAATAATTTTGTTTAACTTTAAGAAGGA

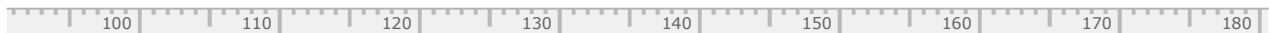

GATATACATATGGTGAGCAAAGGCCGAAGAAGTGTTCACCGGCGTTGTTCCGATTCTGGTTGAACTGGATGGCGACGTGAACGGCCATAAA  
 CTATATGTATACCACTCGTTTCCGCTTCTTGACAAGTGGCCGCAACAAGGCTAAGACCAACTTGACCTACCGCTGCACCTTGCCGGTATT

Met Val Ser Lys Gly Glu Glu Leu Phe Thr Gly Val Val Pro Ile Leu Val Glu Leu Asp Gly Asp Val Asn Gly His Lys

RBS

Em\_GFP

GATATACATATGGTGAGCAAAGGCCGAAGAAGTGTTCACCGGCGTTGTTCCGATTCTGGTTGAACTGGATGGCGACGTGAACGGCCATAAA

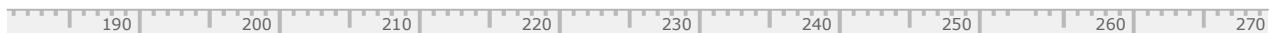

TTTAGCGTTTCTGGCGAAGGCCGAAGGCCGACGCAACTTATGGCAAAGTACCCCTGAAGTTCATTTGCACCACC GGTAAACTGCCGGTTCC  
 AAATCGCAAAGACCGCTTCCGCTTCCGCTTGAATACCGTTGACTGGGACTTCAAGTAAACGTGGTGG CCATTTGACGGCCAAGG

Phe Ser Val Ser Gly Glu Gly Glu Asp Ala Thr Tyr Gly Lys Leu Thr Leu Lys Phe Ile Cys Thr Thr Gly Lys Leu Pro Val Pro

Em\_GFP

TTTAGCGTTTCTGGCGAAGGCCGAAGGCCGACGCAACTTATGGCAAAGTACCCCTGAAGTTCATTTGCACCACC GGTAAACTGCCGGTTCC  
 CCACC CGG AAAAC GCGCGTTCC

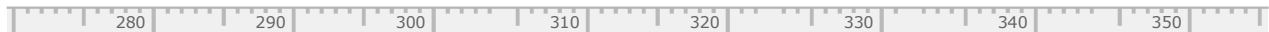

TTGGCCTACTCTGGTTACTACTCTGACTTACGGCG TTCAGTGCTTTGCGCGTT ATCCGGATC ACATGAAGCAGCA CGATTCTTTA  
 AACCGGATGAGACCAATGATGAGACTGAATGCCGC AAGTCACGAAACGCGCAA TAGGCCTAG TGTACTTCGTCGT GCTAAAGAAAT

Trp Pro Thr Leu Val Thr Thr Leu Thr Tyr Gly Val Gln Cys Phe Ala Arg Tyr Pro Asp His Met Lys Gln His Asp Phe Phe

Em\_GFP

TTGGCCTACTCTGGTTACTACTCTGACTTACGGCG TTCAGTGCTTTGCGCGTT ATCCGGATC ACATGAAGCAGCA CGATTCTTTA  
 TTGGCCTACTCTGGTTA TTA TTGACTTACGGAG ATTCA ATGCTT AGCGCGTT TATCCGGATC CACAG GAAGCAGCA ACGATTCTTTA

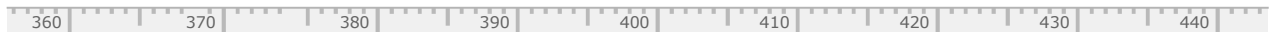

AAAGCGCGATGCC GGAAGG CTACGTTACGGAACGTACCATCTTCTTCAAGGACGACGGTAACACAAAACCCGCGCAGAAGTGAATT  
 TTTCCGCTACGG CCTTCC GATGCAAGTCCTTGCATGGTAGAAGAAGTTCCTGCTGCCATTGATGTTTTGGGCGCGTCTTCACTTTAA

Lys Ser Ala Met Pro Glu Gly Tyr Val Gln Glu Arg Thr Ile Phe Phe Lys Asp Asp Gly Asn Tyr Lys Thr Arg Ala Glu Val Lys Phe

Em\_GFP

AAAGCGCGATGCC GGAAGG CTACGTTACGGAACGTACCATCTTCTTCAAGGACGACGGTAACACAAAACCCGCGCAGAAGTGAATT  
 AAAGCGCGATGCC C GGAAGG CTACGTTACGGAACGTACCATCTTCT C AAGGACGACGGTAACACAAAACCCGCGCAGAAGTGAATT

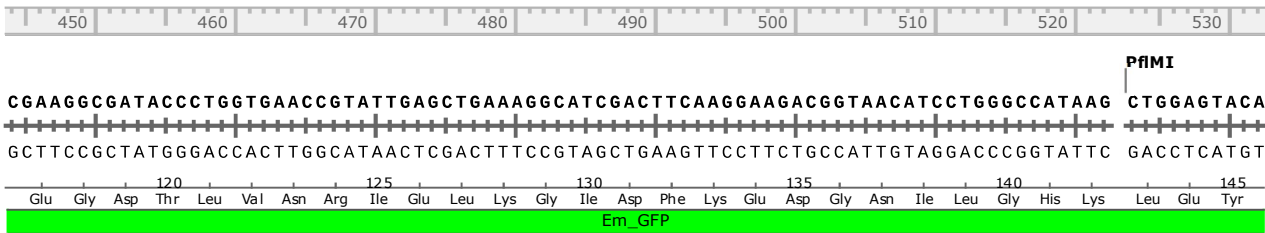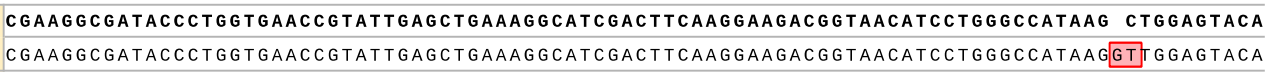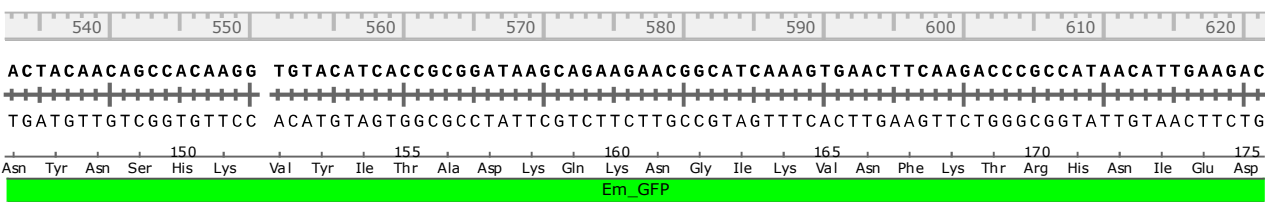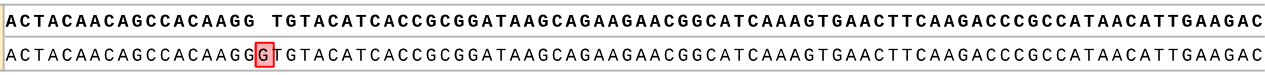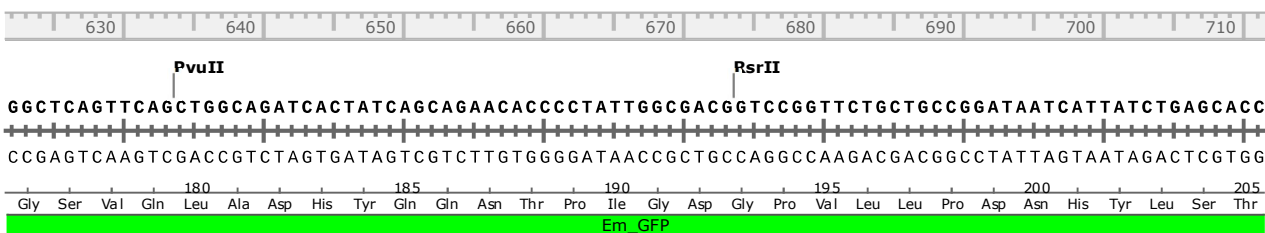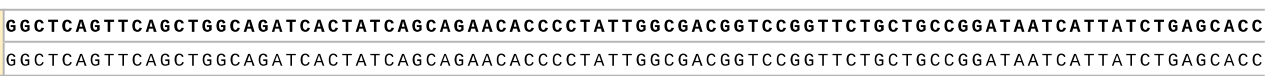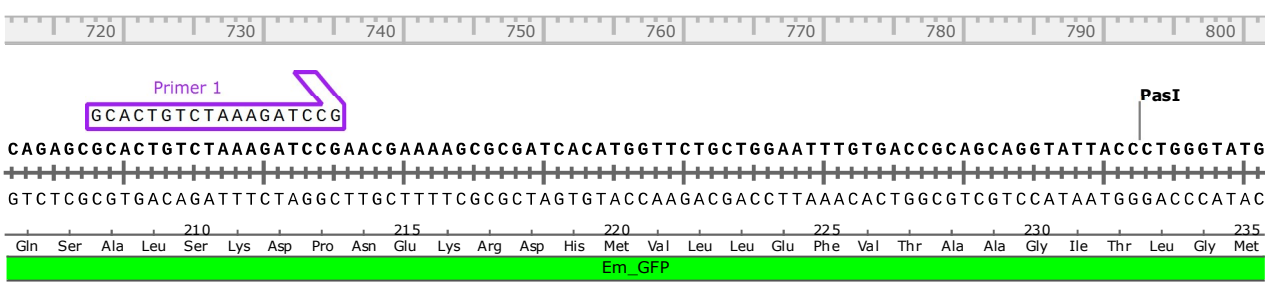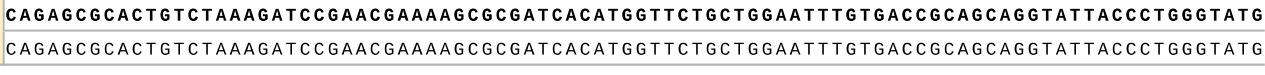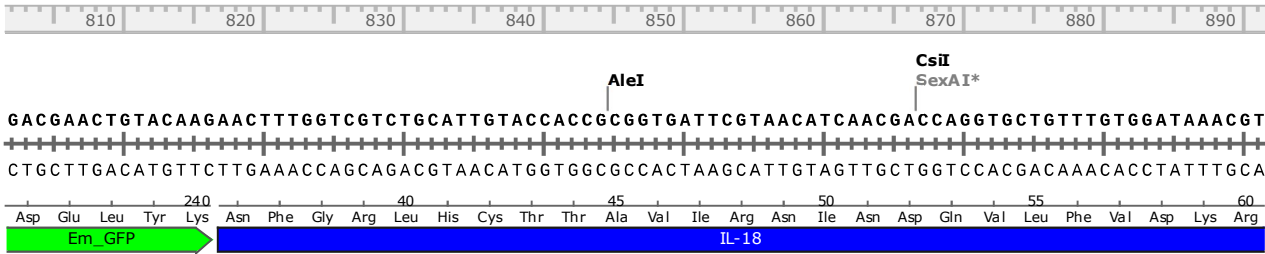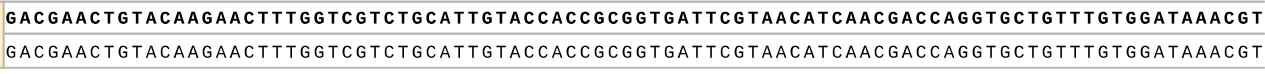

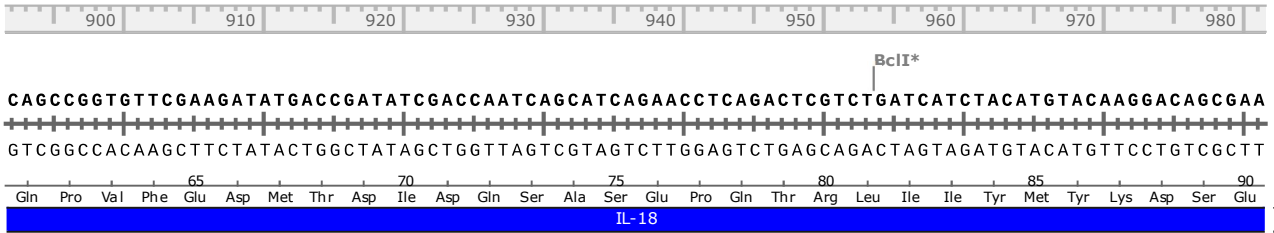

1 ← CAGCCGGTGTTCGAAGATATGACCGATATCGACCAATCAGCATCAGAACCCTCAGACTCGTCTGATCATCTACATGTACAAGGACAGCGAA  
 CAGCCGGTGTTCGAAGATATGACCGATATCGACCAATCAGCATCAGAACCCTCAGACTCGTCTGATCATCTACATGTACAAGGACAGCGAA

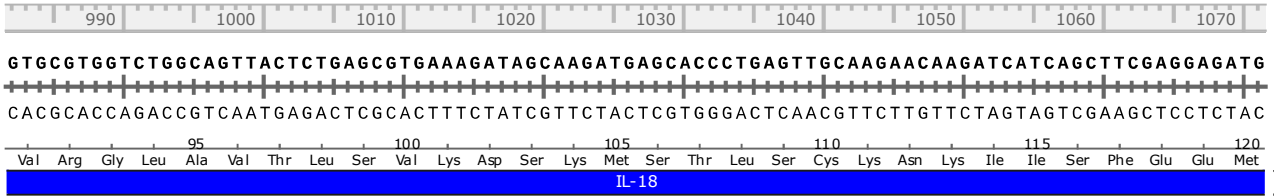

1 ← GTGCGTGGTCTGGCAGTTACTCTGAGCGTGAAAGATAGCAAGATGAGCACCCCTGAGTTGCAAGAACAAGATCATCAGCTTCGAGGAGATG  
 GTGCGTGGTCTGGCAGTTACTCTGAGCGTGAAAGATAGCAAGATGAGCACCCCTGAGTTGCAAGAACAAGATCATCAGCTTCGAGGAGATG

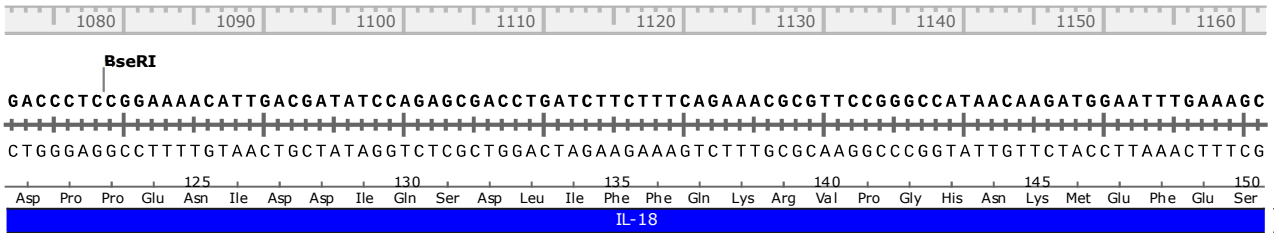

1 ← GACCTCCGAAAACATTGACGATATCCAGAGCGACCTGATCTTCTTTTCAGAAAACGCGTTCCGGGCCATAACAAGATGGAATTTGAAAGC  
 GACCTCCGAAAACATTGACGATATCCAGAGCGACCTGATCTTCTTTTCAGAAAACGCGTTCCGGGCCATAACAAGATGGAATTTGAAAGC

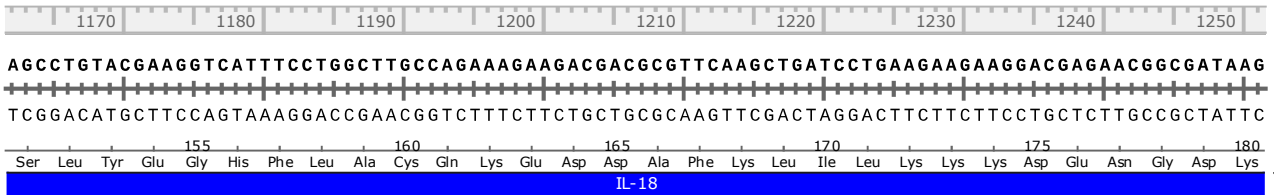

1 ← AGCCTGTACGAAGGTCATTTCTGGCTTGCCAGAAAAGAAGACGACGCGTTCAAGCTGATCCTGAAGAAGAAGGACGAGAACGGCGATAAG  
 AGCCTGTACGAAGGTCATTTCTGGCTTGCCAGAAAAGAAGACGACGCGTTCAAGCTGATCCTGAAGAAGAAGGACGAGAACGGCGATAAG

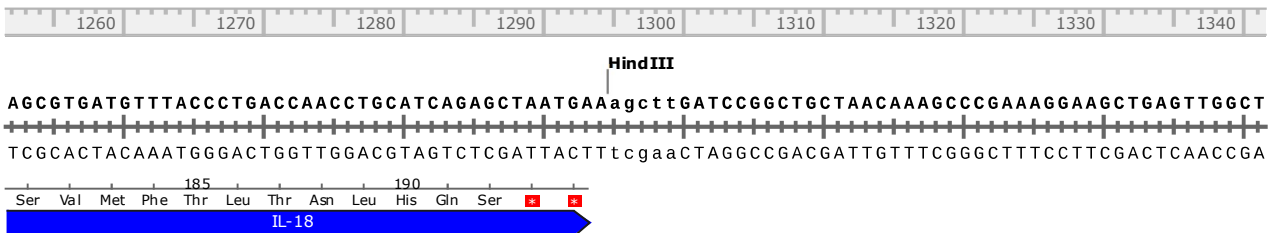

1 ← AGCGTGATGTTTACCCTGACCAACCTGCATCAGAGCTAATGAAAgcttGATCCGGCTGCTAACAAGCCCGAAAAGGAAGCTGAGTTGGCT  
 AGCGTGATGTTTACCCTGACCAACCTGCATCAGAGCTAATGAAAGCTTgaaGCTGATCCGGCTGCTAACAAGCCCGAAAAGGAAGCTGAGTTGGCT

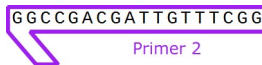



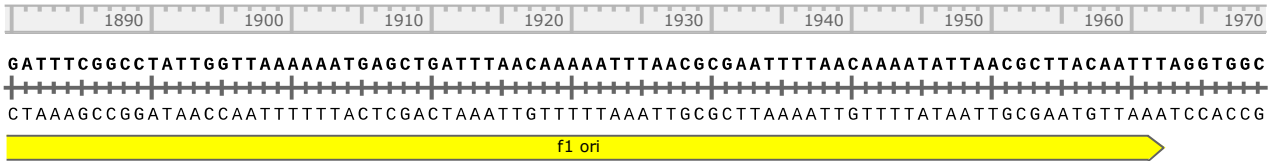

GATTTGCGCCTATTGGTTAAAAAATGAGCTGATTTAACAAAAATTTAACGCGAATTTAACAAAAATTTAACGCTTACAATTTAGGTGGC

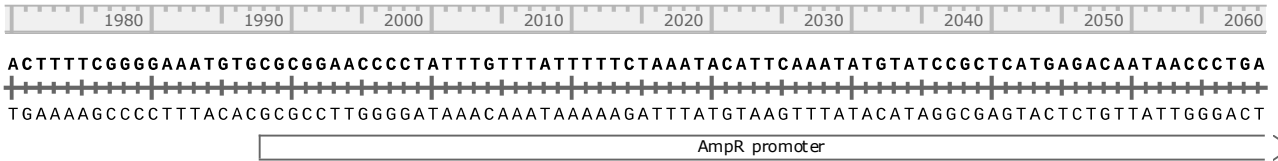

ACTTTTCGGGGAAATGTGCGCGGAACCCCTATTTGTTTATTTTCTAAATACATTCAAATATGTATCCGCTCATGAGACAATAACCTGA

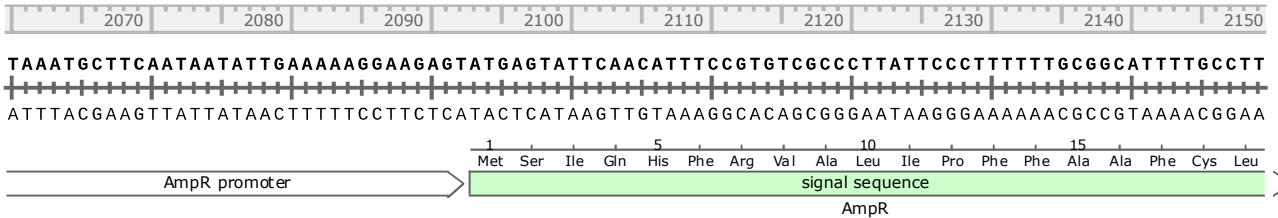

TAAATGCTTCAATAATATTGAAAAAGGAAGAGTATGAGTATTCAACATTTCCGTGTCGCCCTTATTCCTTTTTGCGGCATTTGCCTT

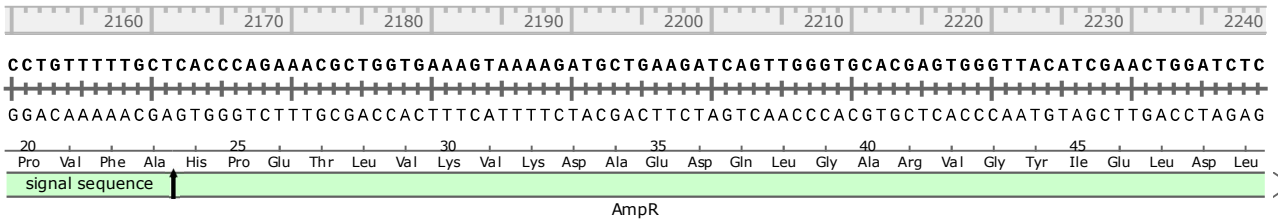

CCTGTTTTGCTCACCCAGAAACGCTGGTGAAAGTAAAAGATGCTGAAGATCAGTTGGGTGCACGAGTGGGTTACATCGAACTGGATCTC

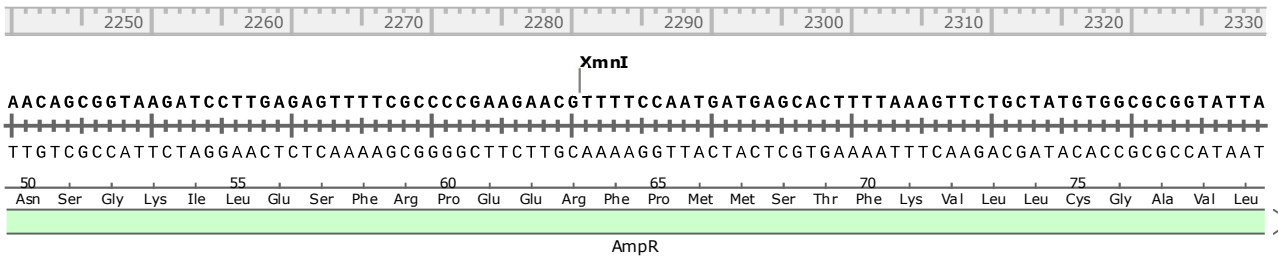

AACAGCGGTAAGATCCTTGAGAGTTTTTCGCCCGAAGAACGTTTTCCAATGATGAGCACTTTTAAAGTTCTGCTATGTGGCGCGGTATTA

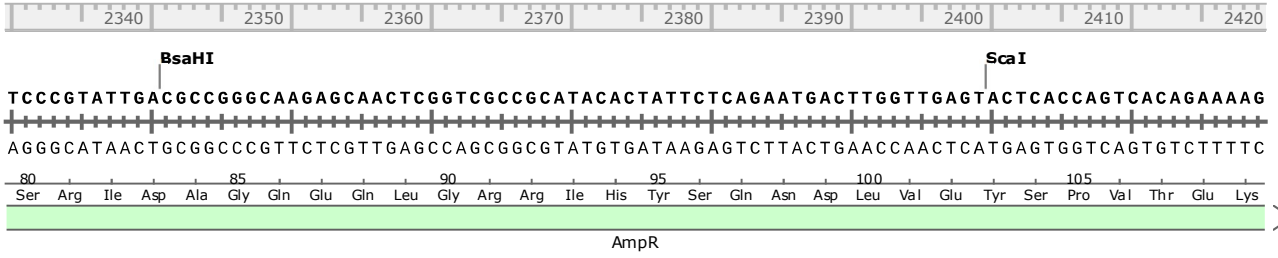

TCCCGTATTGACGCCGGGCAAGAGCAACTCGGTCGCCGCATACACTATTCTCAGAATGACTTGTTGAGTACTCACCAGTCACAGAAAAG

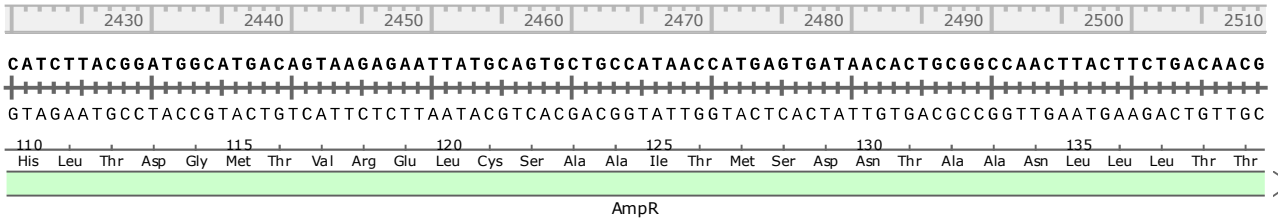

CATCTTACGGATGGCATGACAGTAAGAGAATTATGCAGTGCTGCCATAACCATGAGTGATAAACTGCGGCCAACTTACTTCTGACAACGG

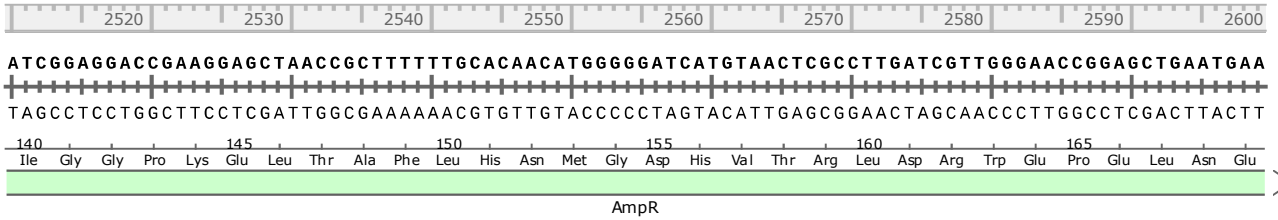

ATCGGAGGACCGAAGGAGCTAACCGCTTTTTTGCACAACATGGGGGATCATGTAACCTCGCCTTGATCGTTGGGAACCGGAGCTGAATGAA

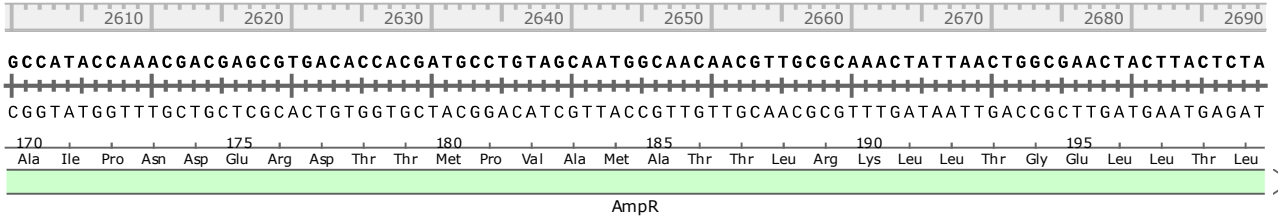

GCCATACCAAACGACGAGCGTGACACCACGATGCCTGTAGCAATGGCAACAACGTTGCGCAAACCTATTAAGTGGCGAACTACTTACTCTA

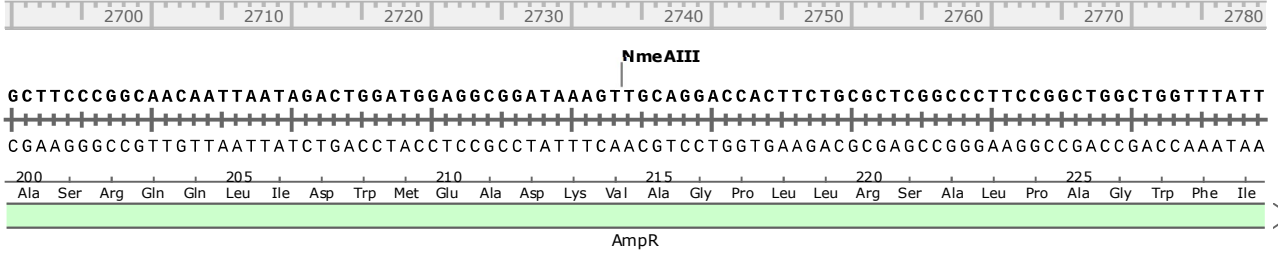

GCTTCCGGCAACAATTAATAGACTGGATGGAGGCGGATAAAGTTGCAGGACCCTTCTGCGCTCGGCCCTTCCGGCTGGCTGGTTTATT

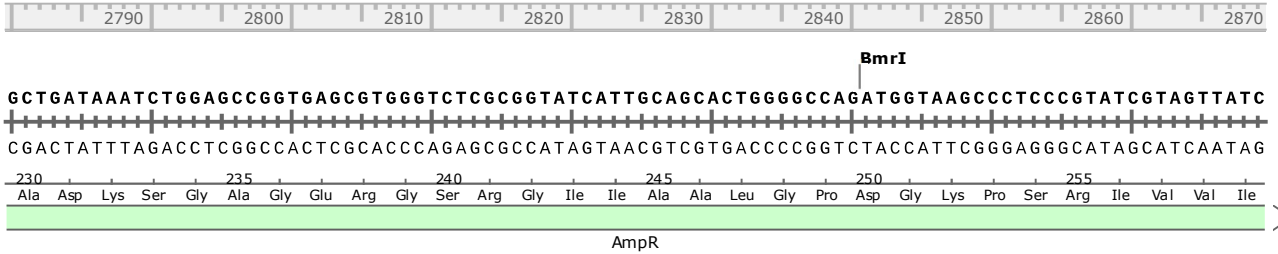

GCTGATAAATCTGGAGCCGGTGAGCGTGGGTCTCGCGGTATCATTGCAGCACTGGGGCCAGATGGTAAGCCCTCCCGTATCGTAGTTATC

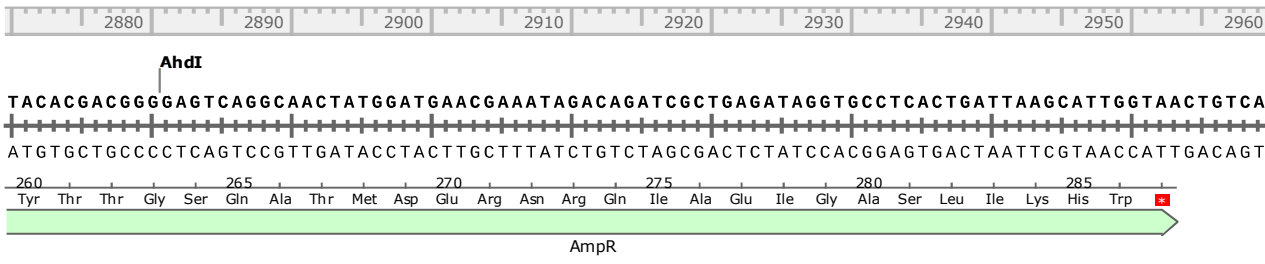

TACACGACGGGGAGTCAGGCAACTATGGATGAACGAAATAGACAGATCGCTGAGATAGGTGCCTCACTGATTAAGCATTGGTAACTGTCA

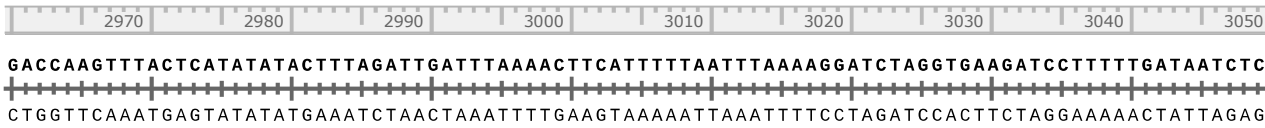

GACCAAGTTTACTCATATATACTTTAGATTGATTTAAAACCTTCATTTTTAATTTAAAAGGATCTAGGTGAAGATCCTTTTTGATAATCTC

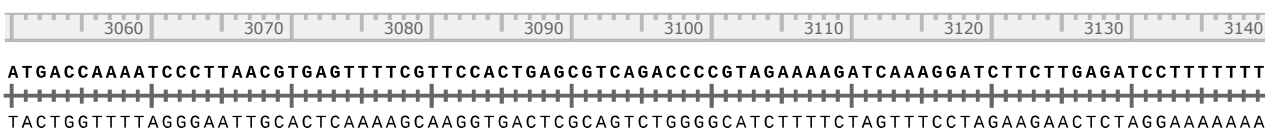

ori

ATGACCAAAATCCCTTAACGTGAGTTTTCGTTCCTGAGCGTCAGACCCCGTAGAAAAGATCAAAGGATCTTCTTGAGATCCTTTTTTT

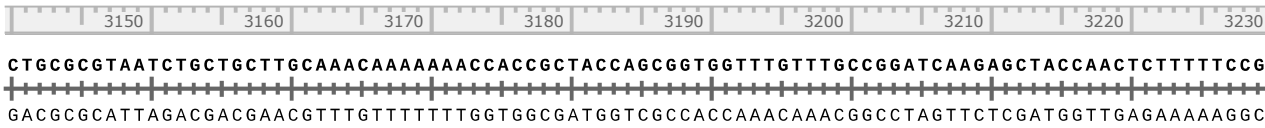

ori

CTGCGCGTAATCTGCTGCTTGC AAAACAAAAAACACCAGCTACCGCGGTGGTTTGGTTTGC CGGATCAAGAGCTACCAACTCTTTTTCCG

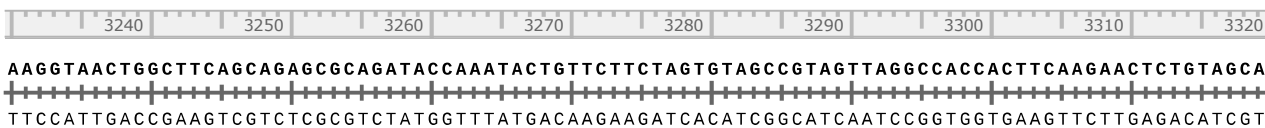

ori

AAGGTAAC TGGCTT CAGCAGAGCGCAGATACCAAATACTGTTCTTCTAGTGTAGCCGTAGTTAGGCCACC ACTTCAAGA ACTCTGTAGCA

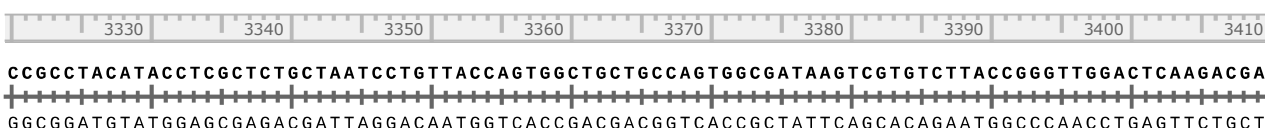

ori

CCGCCTACATACCTCGCTCTGCTAATCCTGTTACCAAGTGGCTGCTGCCAGTGGCGATAAGTCTGTCTTACCGGGTTGGACTCAAGACGA

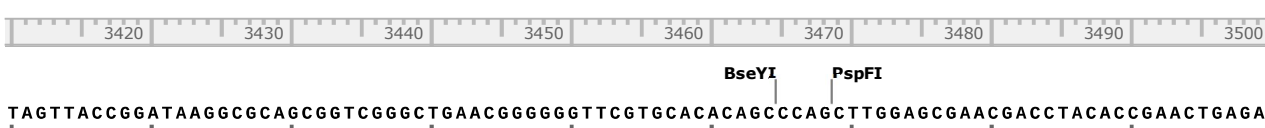

ori

TAGTTACCGGATAAGGCGCAGCGGTGCGGGCTGAACGGGGGTTCTGTGCACACAGCCAGCTTGGAGCGAACGACCTACACCGAACTGAGA

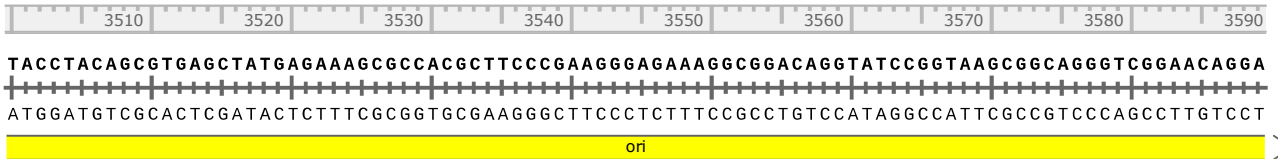

TACCTACAGCGTGAGCTATGAGAAAAGCGCCACGCTTCCCGAAGGGAGAAAAGCGGACAGGTATCCGGTAAGCGGCAGGGTCGGAACAGGA

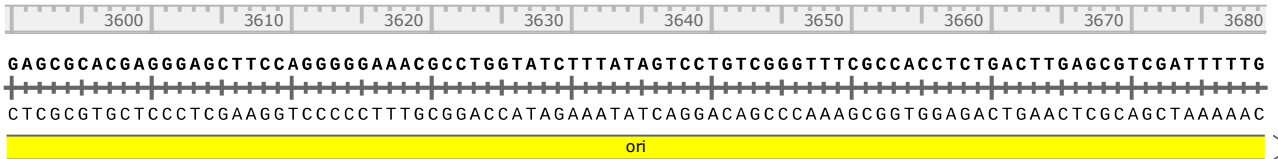

GAGCGCACGAGGGAGCTTCCAGGGGAAACGCCTGGTATCTTTATAGTCCTGTCTGGGTTTCGCCACCTCTGACTTGAGCGTCGATTTTTG

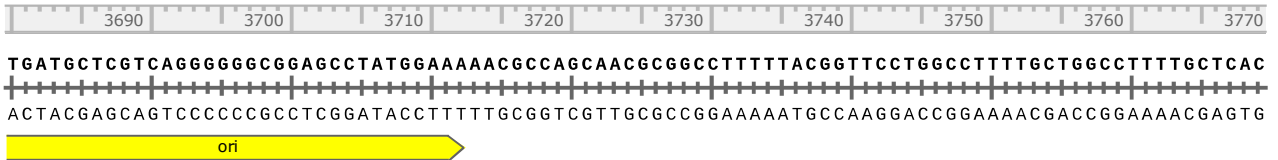

TGATGCTCGTCAGGGGGCGGAGCCTATGAAAAACGCCAGCAACGCGGCCTTTTTACGGTTCTG6CCTTTTGTG6CCTTTTGTCTCAC

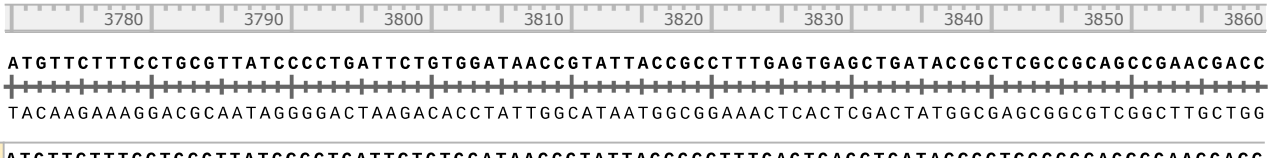

ATGTTCTTTCTGCGTTATCCCCTGATTCTGTGGATAACCGTATTACCGCCTTTGAGTGAGCTGATACCGCTCGCCGAGCCGAACGACC

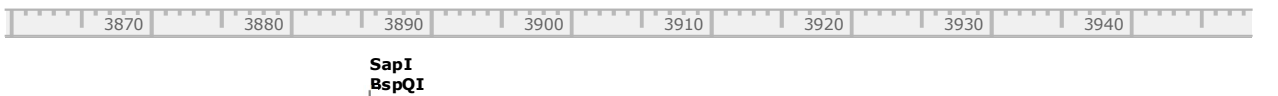

GAGCGCAGCGAGTCAGTGAGCGAGGAAAGCGGAAAGAGCGCCCAATACGCAAACCGCCTCTCCCCGCGGTTGGCCGATTTCATTAATGCAG  
 CTCGCGTGCCTCAGTCACTCGCTCCTTCGCTTCTCGCGGTTATGCGTTTGGCGGAGAGGGGCGCAACCGGCTAAGTAATTACGTC

3'  
5'

Original Sequence: pAE\_EmGFP\_IL18\_ativa\_(cloned\_-\_seq\_sintese).dna  
 1 .. 3948

7-pAE-II-18-EmGFP-SS-468-Seq-pAE-R\_A04 ←  
 1263 bases / 12 Apr 2024  
 27 .. 1142 (9 mismatches, 12 gaps)
